# Supplementary material for: Microarray Analysis of Tomato’s Early and Late Wound Response Reveals New Regulatory Targets for Leucine Aminopeptidase A
Source: PLoS One. 2013 Oct 24;8(10):e77889. doi: 10.1371/journal.pone.0077889 (PMC3812031; doi:10.1371/journal.pone.0077889)
Supplement: Table S3 — Differentially expressed stress-responsive genes (BIN20) after wounding of WT and LapA-SI leaves. (XLSX) [file pone.0077889.s004.xlsx]

## Sheet: Table S3.Stress Genes
Table S3. Differentially expressed stress-responsive genes (BIN20) after wounding of WT and LapA-SI leavesA.
						WT								LapA-SI
			0 hr		1	hr		8	hr		0 hr		1	hr		8	hr
Temporal class	Clone IDB	Annotation			Local	Systemic		Local	Systemic				Local	Systemic		Local	Systemic
1-hr
	STMIW03	Similar to AtWRKY40	-0.00652735		1.36062	-0.0108372		-0.300019	-0.0398711		-0.290867		1.36631	0.166452		-0.0533255	-0.0235367
	STMCN79	Homologue to AtWRKY33	0.157739		1.09777	0.213623		0.240352	0.437201		0.263035		0.76492	0.156289		-0.16933	-0.585189
	STMFB09	Homologue to AtWrky75/StWrky1 (potato SGN-U273670)	0.290573		0.881278	0.410104		0.463891	0.14623		0.545098		0.250386	0.0822567		0.198399	-0.0076518
	STMGA54	Similar to leucine rich-repeat (LRR) protien	0.0885476		1.125	0.615009		0.783687	0.248274		0.506155		0.781949	0.168014		0.204728	0.22001
	STMJA60	Homologue to POTHR-1 protein (Hin1-like protein)	0.189679		1.08842	0.125105		0.168822	0.208024		0.129201		0.964169	-0.0285861		0.551743	-0.129995
	STMGZ63	Whitefly-induced gp91-phox (Wfi1)	-0.0300224		0.936942	-0.412768		0.27806	0.497262		-0.141751		1.19619	-0.237158		0.148274	0.0160257
	STMFB59	Similar to class IV chitinase	0.160082		1.35336	0.580295		0.794076	-0.0397761		0.650565		0.615691	0.163211		0.745545	-0.25966
	STMDH09	Similar to osmotic stress-activated protein kinase	0.242141		0.945747	0.610392		0.342746	0.159343		0.783356		0.0439357	0.164541		0.071606	0.0319781
	STMIQ26	Late embryogenesis abundant (LEA)-like protein (ER5-like)	-0.0993342		1.12424	0.472377		-0.625649	-0.355721		-0.395798		0.872576	0.30956		-0.129683	-0.837669
	STMGA34	Ethylene-responsive late embryogenesis protein (ER5)	0.128961		2.02933	1.2653		0.362411	0.155876		0.400047		1.04132	0.598184		0.111972	-0.297272
	STMEY92	Similar to universal stress protein (USP) family protein	0.0765893		1.73433	0.396272		0.579282	0.281165		-0.240781		1.25435	0.348824		0.651288	0.218653
	STMEQ06	Major intrinsic protein 2	-0.132145		-0.961335	-0.6564		-0.0446061	-0.535665		-0.312458		-0.79503	-0.421457		-0.364191	-0.588833
	STMIS78	Probable aquaporin NIP5.1	-0.183032		-0.870196	-0.141125		-0.748597	-0.0890186		-0.356193		-0.312877	-0.186089		-0.680123	-0.336767
	STMGU90	Similar to UV-B and ozone similarly regulated protein 1 UOS1	-0.0924702		-0.827986	-0.35335		-0.651799	-0.456223		-0.267913		-0.433191	0.0610643		-0.877374	-0.385071
1-hr and 8-hr
	STMCN84	MYC-like transcription factor (bHLB-Myc family)	0.228423		1.32943	0.618006		0.807961	0.274559		0.584285		1.0376	0.196468		0.0215629	0.240191
	STMFB93*	Pathogenesis-related protein (PR1c)	0.249538		1.27438	0.010804		1.0138	-0.478287		0.931957		0.0250529	-0.537688		0.944067	-0.763827
	STMFB60*	Pathogenesis-related leaf protein 6 precursor	-0.0616438		1.97257	-0.127824		1.31447	-0.312843		1.13349		0.818644	-0.382565		2.02953	-0.940316
	STMEY55*	Similar to pathogenesis related protein 10	-0.141468		0.923242	-0.139143		1.18916	-0.388839		0.323929		0.24445	-0.379297		1.46008	-0.918757
	STMIS93*	Homologue to endochitinase A precursor	-0.0151601		1.3077	-0.403464		1.22253	-0.630887		0.268635		0.404991	-0.45791		1.64486	-0.783641
	STMEY20	Chitinase, class II	0.0556098		0.96407	-0.000333398		1.09175	-0.231597		0.428835		0.383831	-0.156831		1.06193	-0.453045
	STMEO91*	Acidic 26-kDa endochitinase precursor	0.0840894		1.56626	-0.0652592		1.12078	-0.166316		0.837283		0.959233	0.164232		2.46314	0.198253
	STMHY32*	Homologue to xyloglucan-specific fungal endoglucanase inhibitor	0.135418		1.00237	0.113576		1.26218	0.120685		0.306395		0.816781	0.0404292		1.48533	-0.155973
	STMGC07*	Homologue to cathepsin B-like cysteine proteinase	-0.0104543		0.862768	0.212591		1.01817	0.493023		0.346666		0.367691	0.0245986		1.45325	0.889485
	STMCK62	Weakly similar to serine carboxypeptidase	0.0809677		0.952911	0.142393		1.07357	-0.0661849		0.661179		0.522447	0.0447813		1.2664	0.156753
	STMEF73	Polygalacturonase family protein	0.0715773		1.49406	-0.264088		1.49513	-0.603106		0.614652		0.121962	-0.515864		1.56863	-0.863587
	STMDO41*	Polyphenol oxidase	0.499425		0.863126	0.320393		3.56557	3.38539		0.469532		0.830247	0.438057		3.08296	3.49493
	STMDB46	Homologue to propolyphenol oxidase precursor	0.858295		0.898526	0.500466		4.5922	4.28872		0.861188		0.683914	0.946018		3.75136	4.63249
	STMCR61	Neutral leucine aminopeptidase preprotein precursorC	0.475657		1.17069	0.0736456		2.34551	2.35585		-0.102411		-0.477299	-0.30093		-0.486898	-0.561813
	STMGC30	Leucine aminopeptidase A	0.485216		0.998926	0.0157602		2.79873	2.67208		-1.21346		-0.660111	-0.617671		-0.96968	-0.792805
	STMIT44*	Homologue to osmotin-like protein	-0.0376107		1.1387	-0.358128		1.4159	-0.283793		0.352281		0.635153	-0.346681		1.58448	-0.444704
	STMCP23*	Similar to endoplasmin homolog precursor (HSP90)	0.275337		0.838381	0.636441		1.35317	1.40413		0.577124		0.138202	0.225773		1.3032	1.62322
	STMGE38	TAS14 (Le4)- dehydrin	0.184694		1.25641	0.477828		1.24219	0.124761		1.30601		0.712744	0.0917038		2.16364	-0.160878
8-hr
	STMHA17	Homologue to AtWRKY13	0.194387		0.161882	0.153634		1.36179	1.50956		0.0350785		0.0626723	0.0175287		1.43968	1.67645
	STMDT95	Weakly similar to NBS/LRR resistance protein	0.184281		0.612991	0.31256		1.09017	0.559431		0.394416		0.13226	0.3299		1.16958	0.8264
	STMGX36*	Lipoxygenase A	0.131974		0.569915	0.137449		2.52898	0.907955		0.442069		0.532472	-0.03133		3.23684	1.4239
	STMGZ27*	Homologue to Phospholipase A1	0.087514		0.530475	0.254088		1.28499	0.941304		-0.235626		0.224472	0.2746		1.74608	1.24368
	STMGL95	Similar to Lipoxygenase 6	0.0867683		0.125433	0.0767904		0.995954	0.737817		-0.0311502		0.230045	0.116025		0.770115	1.11484
	STMCL45	Systemin precursor	0.148071		0.316144	0.462279		0.529595	1.16058		0.0872725		0.211351	0.217479		1.05802	1.33171
	STMCP56	Polyphenol oxidase B	0.714085		0.710396	0.596433		4.71023	4.08845		0.783973		0.593946	0.737541		3.41267	4.85527
	STMIU61*	Similar to proteinase inhibitor I	0.200741		0.0531683	0.300648		3.28315	3.448		-0.409618		0.277293	0.273302		3.3592	3.82372
	STMHT35*	Proteinase inhibitor II	0.589551		0.195945	-0.0393907		2.74896	3.13667		-0.12807		0.38279	-0.0647552		3.26642	3.69634
	STMCQ55	Cathepsin D inhibitor precursor	0.806195		0.363779	0.0317196		3.18053	3.41214		0.0175125		0.265463	0.376103		2.46653	4.02018
	STMIX49	Homologue to Cystatin, cysteine protease inhibitor	0.0675107		0.0727716	0.207578		0.511733	1.03549		-0.22445		0.201827	-0.0584856		0.454152	0.654886
	STMCG57	Metallocarboxypeptidase inhibitor precursor	0.28169		-0.0739387	0.431311		1.59406	1.85717		0.386419		-0.105781	0.187184		1.15256	1.94115
	STMCK43	Similar to polygalacturonase-inhibiting protein	0.0454428		0.748314	0.437959		1.4395	1.09799		0.106556		0.788709	0.501985		1.43831	1.38301
	STMCP01	Luminal-binding protein precursor, HSP70 family protein	0.0770796		0.362626	0.215529		1.02703	1.17201		-0.108462		0.235717	0.293049		1.12477	1.62215
	STMGN23	Similar to heat shock protein 70	0.100886		0.0757923	0.0539741		0.948194	1.19511		-0.111411		0.149303	0.159171		1.35839	1.72752
	STMEA30	Probable aquaporin	0.0274689		-0.321803	-0.265128		1.09383	0.699737		-0.313953		-0.113594	0.163499		1.07549	1.15481
	STMDE88	Similar to salt tolerance protein 5-like protein	0.030474		0.26156	-0.0429436		1.33096	0.889918		0.0136048		-0.221571	-0.111391		1.1613	0.97719
	STMCL06*	Homologue to 2-oxoglutarate-dependent dioxygenase (SPP2)	0.103644		0.0235165	0.25915		1.12084	0.584244		-0.194772		-0.411097	0.249972		1.45871	0.975468
	STMDD59	Putative CCR4-associated factor	-0.0884003		-0.153277	-0.0456433		0.101389	0.80538		0.118361		-0.00694257	-0.0867959		-0.0217439	0.219857
	STMCV39	Similar to SRE1b	0.359689		0.376239	0.269753		0.808678	0.406764		0.529051		0.306143	0.56644		0.502305	0.648715
	STMCS03	Homologue to STS14 protein precursor	0.178292		0.769145	0.379813		0.934375	0.357761		0.396908		0.0370825	0.0204067		0.235892	0.209336
	STMCA80	Similar to Nicotiana tabacum wound induced mRNA	-0.142479		-0.396528	-0.349116		0.826433	0.248767		-0.357546		-0.68693	-0.191356		0.691698	0.330592
	STMCV76	Homologue to Heat shock protein 83	-0.128692		-0.429851	0.0314072		-0.805417	-0.200133		-0.214533		-0.260599	0.00118749		-0.744918	-0.183287
	STMEA19	Homologue to Heat shock cognate protein 80	-0.344298		-0.498774	-0.250614		-0.821819	-0.363435		-0.473496		0.0724196	-0.0314857		-0.2758	-0.422932
	STMHS08	Homologue to Heat shock protein 81-1 (HSP81-1)	-0.250654		-0.303599	-0.278391		-0.846126	-0.399892		-0.40855		0.266126	0.0576383		-0.375622	-0.309307
	STMEQ11	Similar to DnaJ-like protein (putative molecular chaperone)	8.18e-05		-0.329205	-0.150616		-0.721105	-0.832666		0.161739		-0.198571	-0.0559544		-1.0673	-1.03874
	STMCG30	Homologue to cold-induced glucosyl transferase	-0.0996751		0.0145185	-0.392217		-0.905444	-1.0262		-0.0388585		0.302723	0.0410326		-0.405443	-1.30424
	STMCR71	Weakly similar to dehydration-induced protein RD22 (BURP domain protein)	-0.00904966		-0.361291	-0.0891159		-0.933902	-0.696695		0.0254164		-0.387256	0.0917397		-0.998781	-0.724243
	STMJO29	Homologue to dehydrin CI7 (Dhn2)	-0.472478		0.678989	0.265119		-0.828993	-0.612201		-0.349688		0.0138075	-0.277407		0.184475	-1.34821
	STMIV08*	Putative delta tonoplast intrinsic protein	-0.140464		-0.551206	-0.164991		-0.87904	-0.714713		-0.481684		-0.405053	-0.175279		-1.22879	-0.774641
A DEGs (|FC| ≥0.8; p <0.05) are indicated in bold and shaded in grey. DEGs that are down-regulated are boxed in.
B Some genes are represented by multiple clones on the TIGR 10-K (version 3) potato cDNA microarray. These genes are indicated with an asterisk. One representative clone shown. Redundant clones can be found in Table S4.
C LapN was annotated as an up-regulated DEG. This is in striking contrast to the previous studies monitoring the rare-class LapN RNAs by RNA blots or RNase protection studies or monitoring LAP-N protein levels [24, 116]. It is likely that the abundant wound-induced LapA transcript cross-hybridized to the LapN ESTs on the array, since the potato LapN EST has 95.6% and 88.9% identity with the tomat…
