# Supplementary material for: Microarray Analysis of Tomato’s Early and Late Wound Response Reveals New Regulatory Targets for Leucine Aminopeptidase A
Source: PLoS One. 2013 Oct 24;8(10):e77889. doi: 10.1371/journal.pone.0077889 (PMC3812031; doi:10.1371/journal.pone.0077889)
Supplement: Table S4 — Differentially regulated genes after wounding in WT and LapA-SI lines represented by multiple clones on TIGR 10-K cDNA microarray. (XLSX) [file pone.0077889.s005.xlsx]

## Sheet: Sheet1
Table S4. Differentially regulated genes after wounding in WT and LapA-SI lines represented by multiple clones on TIGR 10-K cDNA microarrayA.
					WT								LapA-SI
		0 hr		1	hr		8	hr		0 hr		1	hr		8	hr
Clone numberB	Description			Local	Systemic		Local	Systemic				Local	Systemic		Local	Systemic
STMEA11	LeXYL1 protein (β‐d‐xylosidase)	-0.256767		-1.1541	-0.599079		-0.486046	-0.631758		-0.210924		-1.23913	-0.593388		-0.927943	-0.914046
STMEA15		-0.199257		-1.1203	-0.596295		-0.465284	-0.479862		-0.375816		-1.16435	-0.523836		-0.828011	-0.758889
STMEI66*	Similar to plastidial delta-12 oleate desaturase	-0.106094		-0.295748	-0.0878863		-1.97602	-1.33348		0.120078		-0.156442	0.0550656		-1.53489	-1.60166
STMCU78		-0.174462		-0.735904	-0.376521		-2.16091	-1.39643		-0.36014		-0.154325	0.00589029		-1.5778	-1.47662
STMCK79		-0.0262261		-0.283562	0.0500756		-1.85609	-1.32547		0.0879832		-0.170626	0.165051		-1.51335	-1.56153
STMCM57		0.159784		0.0318256	0.273828		-0.760921	-0.597692		0.476384		-0.186776	0.0251586		-0.753785	-0.856905
STMGZ27*	Homologue to phospholipase A1	0.087514		0.530475	0.254088		1.28499	0.941304		-0.235626		0.224472	0.2746		1.74608	1.24368
STMGE39		0.140987		0.198636	0.332972		1.04418	0.672356		0.106119		0.15927	0.257324		1.07894	0.836268
STMCF50		0.221754		1.00582	0.51354		1.60849	0.987742		0.653603		0.131612	0.244457		1.57214	1.20852
STMCJ60*	S-adenosylmethionine synthetase 1	0.0388341		0.396702	0.0241419		1.27843	0.800514		0.0331196		0.439303	0.38946		1.10352	1.26088
STMCD54		0.17331		0.853436	0.34758		1.68282	1.0453		0.365116		0.800996	0.482562		1.60969	1.38008
STMGS62		-0.0566362		0.212596	0.0315495		1.00648	0.730211		-0.270066		0.527308	0.308919		0.936183	1.14428
STMGZ79		-0.0583267		0.296459	0.0149375		1.06615	0.768492		-0.219185		0.56493	0.339819		1.10261	1.12332
STMCI86		0.0788839		0.565435	0.160721		1.17204	0.803186		0.130212		0.392108	0.308995		0.739925	1.06537
STMCQ94		0.0998151		0.447926	0.309692		1.39712	0.963249		0.380292		0.373305	0.175769		0.850595	1.1583
STMGU10	Homologue to gamma-aminobutyrate transaminase isozyme 2	0.0698241		-0.251778	0.0774031		0.591311	0.904402		-0.335101		0.0681517	0.398597		1.14268	1.25777
STMCQ79		0.291726		0.113746	0.371482		0.930374	0.964554		-0.0243842		0.00194067	0.592621		0.985406	1.39201
STMCG71		0.05284		0.0247146	0.0391091		0.495899	0.895902		-0.237015		-0.224646	0.183114		0.979431	1.02841
STMGN32		0.0170165		-0.247697	0.0973098		0.42296	0.833125		-0.430541		-0.0545059	0.169626		0.730791	1.05915
STMCB25		0.069845		-0.22341	0.251314		0.451922	0.973452		-0.294526		-0.192149	0.323246		0.738078	1.19428
STMHR62*	Similar to N-acetylornithine deacetylase-like protein	0.156407		0.377367	0.0787153		1.98096	1.83547		-0.378675		0.679095	0.491552		1.84493	2.25636
STMGE43		0.131612		0.407066	0.0699953		2.02955	1.47544		0.0278371		0.361177	0.319711		1.68319	1.80128
STMCG42*	Similar to aminotransferase 2	-0.119896		-0.916676	-0.47563		-0.238729	-0.786766		-0.225546		-0.647936	-0.475995		-0.473362	-0.473362
STMJB23		-0.158289		-0.842852	-0.544224		-0.295176	-0.686199		-0.245887		-0.432013	-0.38836		-0.394854	-0.394854
STMJA37*	Aromatic amino acid decarboxylase 1A	0.154978		0.764758	0.0392113		0.144834	0.825593		0.00139079		1.31318	0.0946231		0.125609	0.389238
STMEP88		0.18957		0.811069	0.427061		0.436508	0.63461		0.448851		0.940485	0.0693088		0.0688724	0.228905
STMGU61*	Similar to probable acetylornithine aminotransferase	0.120821		1.49265	0.155545		1.55874	0.971689		-0.00654116		1.13467	0.218202		0.831308	0.831308
STMHX08		-0.00550219		1.06311	0.0999645		0.728221	0.634994		-0.208927		0.831236	0.162506		0.545033	0.545033
STMGC07*	Homologue to Cathepsin B-like cysteine proteinase	-0.0104543		0.862768	0.212591		1.01817	0.493023		0.346666		0.367691	0.0245986		1.45325	0.889485
STMJB45		-0.00109504		0.907989	0.0597502		1.02725	0.77453		-0.182689		0.681251	0.238809		1.99691	1.24076
STMEI96		-0.0196288		0.412913	-0.0201112		0.745277	0.515308		-0.214737		0.365536	0.115171		1.34203	0.740051
STMEU11		-0.0149991		0.763835	-0.143166		1.04858	0.637065		-0.371839		0.610231	0.208268		2.04858	1.19736
STMHO21		-0.0460057		0.154165	-0.000430554		0.456253	0.358783		-0.210121		0.217744	-0.0317885		1.03564	0.534455
STMDU15*	Homologue to isopentenyl diphosphate isomerase 1	0.282388		0.260847	0.260847		1.13881	0.558305		0.294805		0.234771	0.323944		0.649118	0.80259
STMDB11		0.209305		0.346899	0.346899		0.984695	0.406237		0.245974		0.191496	0.368754		0.649655	0.745806
STMCV10*	Similar to phytoene synthase 1	-0.111444		-0.911411	-0.911411		-0.93024	-0.732895		-0.0584093		-0.605442	-0.00750324		-0.701609	-0.575921
STMFB34		-0.146729		-0.849712	-0.849712		-0.986809	-0.611328		-0.447817		-0.256557	-0.164567		-0.544276	-0.610555
STMIY78*	Similar to 4-coumarate-CoA ligase-like protein	-0.36265		-0.969734	-0.85857		-2.06318	-1.52909		-0.785187		-0.364139	-0.776721		-1.67645	-2.08544
STMFB08		-0.0502685		0.717349	-0.0467921		-1.14356	-1.23531		-0.0101616		0.552122	-0.0608431		-0.827902	-1.98053
STMJE63*	Homologue to tyramine hydroxycinnamoyl transferase	-0.0218976		1.1326	-0.101659		0.526188	-0.078835		0.103235		0.922769	-0.24484		0.573614	-0.378921
STMIP44		0.0465952		0.886339	-0.195546		0.400727	-0.0464659		-0.0462027		0.740884	-0.11472		0.319559	-0.417216
STMEZ84		0.14826		1.61285	0.21295		0.76298	0.0193007		0.566269		0.962871	0.0355377		0.599499	-0.488589
STMIC76*	P-coumaroyl shikimate 3'-hydroxylase isoform 2	0.127151		0.868644	0.447141		1.22729	1.11247		-0.0494169		0.963453	0.642462		1.10742	1.58466
STMIL92		0.142713		0.76524	0.527382		1.05487	0.961382		-0.0109181		0.825866	0.658404		0.782015	1.45033
STMGP82*	Weakly similar to caffeoyl-CoA O-methyltransferase	0.292943		0.636619	0.250229		1.55006	1.58491		0.280041		0.578162	0.151648		1.60149	1.95687
STMGN18		0.149774		0.17138	-0.132746		0.816342	0.869609		-0.240294		0.514184	0.44225		1.37185	1.41386
STMCL06*	Homologue to 2-oxoglutarate-dependent dioxygenase (SPP2)	0.103644		0.0235165	0.25915		1.12084	0.584244		-0.194772		-0.411097	0.249972		1.45871	0.975468
STMGI29		-0.0591871		-0.402334	-0.114762		0.411323	0.29654		-0.616842		-0.515018	0.0100502		0.800868	0.727147
STMCF39		0.0284455		-0.166682	0.0299881		0.448537	0.630453		-0.349385		-0.508783	0.0802245		0.98823	1.09135
STMJA50*	Homologue to thioredoxin peroxidase	-0.123496		-0.797496	-0.339168		-0.822859	-0.264689		-0.307652		-0.263734	-0.0203458		-0.842553	-0.26187
STMIX55		0.0811745		-0.630542	-0.122498		-0.655998	-0.200542		-0.0813152		-0.0501199	0.286906		-0.861848	-0.11784
STMEW65*	Catalase isozyme 2	-0.00457957		0.708057	-0.118061		1.79279	0.473803		0.236082		0.0855333	-0.331597		1.36493	0.542602
STMDR74		0.145461		0.698871	0.190576		1.17668	0.699725		0.567195		0.170044	0.0313521		1.03276	0.773693
STMIN52*	S-adenosylmethionine decarboxylase proenzyme	0.23783		0.553732	0.382724		2.06405	1.97701		0.0237767		0.652263	0.615114		2.74272	2.23934
STMIR64		0.20371		0.473172	0.393415		2.11966	1.78674		-0.0500433		0.555696	0.601814		2.56586	2.18986
STMEO42		0.239749		0.594233	0.260993		1.88401	1.48815		-0.066945		0.574982	0.46041		1.61775	1.70699
STMCD62		0.298926		0.716334	0.276776		1.76171	1.22853		0.0507675		0.696005	0.434235		1.57186	1.472
STMCP75		0.447395		0.938305	0.390394		1.73811	1.32682		0.107495		0.672201	0.440165		1.5581	1.68154
STMIY61		0.0146214		-0.102035	0.0414782		1.67746	1.04323		-0.33593		0.264739	0.0154496		1.05094	1.25289
STMIX62		0.215126		0.50275	0.58818		1.66043	1.70401		0.0249877		0.53818	0.574955		1.9453	1.94961
STMCV17*	Spermidine synthase	0.41355		0.835053	0.560723		2.16345	2.2131		0.321741		0.676637	0.640058		2.02467	2.73693
STMCQ05		0.323274		0.633549	0.420749		1.4914	1.40933		0.418855		0.340071	0.253153		1.22366	1.73422
STMIW94*	Similar to IAA amidohydrolase-like	-0.0419772		1.72052	0.245767		0.0898243	0.0733699		0.0236764		1.61757	0.586512		0.393191	0.334575
STMIU23		-0.0308546		0.933957	0.103694		0.121773	0.0371925		-0.144912		0.903114	-0.206437		-0.0314691	0.0800057
STMCF04*	Similar to DWARF1/DIMINUTO1	0.203472		0.325246	0.263714		1.33146	1.02943		0.0992754		0.179241	0.448737		1.47776	1.52456
STMCH16		0.234451		0.190106	0.310437		1.01782	0.934492		0.274286		0.0327154	0.484883		0.923582	1.39649
STMCQ85*	Homologue to putative C-8 7 sterol isomerase	0.196394		0.0213277	0.105363		1.24701	0.598858		-0.20134		0.0911919	0.342245		0.958602	1.12269
STMCQ53		0.212395		0.0340059	0.110769		0.993506	0.594398		-0.165798		0.0987476	0.382927		0.900957	1.13337
STMDC82		0.267254		0.1693	0.269007		1.33274	0.609042		0.0296401		0.0697776	0.328079		1.01461	1.16559
STMJC16*	GAST1 protein precursor	-0.201995		-1.3475	-0.317393		-0.985324	0.0716904		-0.484011		-0.449315	-0.224447		-1.11237	-0.071198
STMGD43		-0.0401587		-1.23387	-0.172268		-0.770818	0.230923		-0.371782		-0.537066	0.123873		-1.1091	0.0536884
STMGX36*	Lipoxygenase A	0.131974		0.569915	0.137449		2.52898	0.907955		0.442069		0.532472	-0.03133		3.23684	1.4239
STMGT19		0.0929174		0.350416	-0.0365234		2.59611	1.02908		0.186828		0.459552	0.0979329		3.22928	1.47191
STMGL95		0.0867683		0.125433	0.0767904		0.995954	0.737817		-0.0311502		0.230045	0.116025		0.770115	1.11484
STMFB93*	Pathogenesis-related protein (PR)1c	0.249538		1.27438	0.010804		1.0138	-0.478287		0.931957		0.0250529	-0.537688		0.944067	-0.763827
STMFB44		0.0780676		1.04155	-0.108558		0.823307	-0.334389		0.55351		-0.0146934	-0.655336		0.801253	-0.762122
STMIS93*	Homologue to Endochitinase A precursor	-0.0151601		1.3077	-0.403464		1.22253	-0.630887		0.268635		0.404991	-0.45791		1.64486	-0.783641
STMIX82		-0.085214		1.15938	-0.514607		1.06307	-0.805721		0.20688		0.240614	-0.540767		1.44834	-0.85371
STMEY55*	Similar to pathogenesis related protein 10	-0.141468		0.923242	-0.139143		1.18916	-0.388839		0.323929		0.24445	-0.379297		1.46008	-0.918757
STMCF73		-0.0649516		1.13775	-0.1098		1.24662	-0.428189		0.589212		0.427198	-0.396914		1.6275	-0.93728
STMDW19		-0.0561072		0.980193	-0.105196		1.1699	-0.431347		0.249176		0.272559	-0.276449		1.68697	-0.730439
STMFB60*	Pathogenesis-related leaf protein 6 precursor	-0.0616438		1.97257	-0.127824		1.31447	-0.312843		1.13349		0.818644	-0.382565		2.02953	-0.940316
STMIN04		-0.1236		1.14538	-0.37258		0.628119	-0.296088		0.522601		0.715407	-0.328228		1.47522	-0.603051
STMIT44*	Homologue to osmotin-like protein	-0.0376107		1.1387	-0.358128		1.4159	-0.283793		0.352281		0.635153	-0.346681		1.58448	-0.444704
STMCY79		0.134791		1.85142	-0.251725		1.94585	-0.428262		1.02825		0.478534	-0.618627		2.04605	-0.936051
STMIT70		-0.162431		1.01485	-0.51369		1.32984	-0.447155		0.380877		0.557762	-0.467569		1.4382	-0.621688
STMEO91*	Acidic 26 kDa endochitinase precursor	0.0840894		1.56626	-0.0652592		1.12078	-0.166316		0.837283		0.959233	0.164232		2.46314	0.198253
STMJD93		0.0400879		0.911801	-0.15339		0.859311	-0.118162		0.267845		0.627116	0.333427		1.91943	0.11953
STMCP23*	Similar to endoplasmin homolog precursor (HSP90)	0.275337		0.838381	0.636441		1.35317	1.40413		0.577124		0.138202	0.225773		1.3032	1.62322
STMEG24		0.024294		0.326154	0.144415		1.06759	1.08271		-0.0903671		0.117116	0.391671		1.28234	1.37111
STMIU61*	Homologue to proteinase inhibitor I	0.200741		0.0531683	0.300648		3.28315	3.448		-0.409618		0.277293	0.273302		3.3592	3.82372
STMCO50		0.452914		0.568809	0.559407		3.41375	3.79952		0.195918		0.183052	0.418404		3.29402	3.80709
STMCM05		0.455148		0.497209	0.824885		2.5524	2.68075		0.541585		0.325007	0.33101		2.34033	2.82474
STMDO41*	Polyphenol oxidase	0.499425		0.863126	0.320393		3.56557	3.38539		0.469532		0.830247	0.438057		3.08296	3.49493
STMDU79		0.522113		0.852422	0.355531		4.17693	3.98728		0.315116		0.879449	0.535046		3.26565	4.14292
STMGP96		0.383354		0.607004	0.365761		3.09879	2.59617		0.279636		0.455723	0.190147		2.76965	3.15694
STMEB67		0.503214		0.445065	0.18883		3.18466	3.42089		0.161334		0.558366	0.262168		3.20775	3.32532
STMEB19		0.59245		0.175741	0.286693		3.57938	3.42878		0.157688		0.710938	0.399409		3.16934	3.37215
STMIV08*	Putative delta tonoplast intrinsic protein	-0.140464		-0.551206	-0.164991		-0.87904	-0.714713		-0.481684		-0.405053	-0.175279		-1.22879	-0.774641
STMJO58		-0.119792		-0.213913	-0.105925		-0.711329	-0.890882		-0.339075		-0.253101	-0.161668		-1.01257	-0.860566
STMHT35*	Proteinase inhibitor II	0.589551		0.195945	-0.0393907		2.74896	3.13667		-0.12807		0.38279	-0.0647552		3.26642	3.69634
STMJA26		0.0218852		-0.55055	-0.105889		0.844209	1.38314		-0.3154		-0.209253	-0.000506081		1.05448	1.57967
A gDEGs (|FC| ≥0.8; p <0.05) are indicated in bold and highlighted in grey. Down-regulated DEGs are boxed in.
B Some genes were representated by multiple cDNA clones (spots) on the 10-K array. Only one representative clone for these genes appears in Tables 1-3. The identity of the redundant clones is provided here.
Representative clones on other tables are marked with asterisks.
