# Supplementary material for: Microarray Analysis of Tomato’s Early and Late Wound Response Reveals New Regulatory Targets for Leucine Aminopeptidase A
Source: PLoS One. 2013 Oct 24;8(10):e77889. doi: 10.1371/journal.pone.0077889 (PMC3812031; doi:10.1371/journal.pone.0077889)
Supplement: Table S6 — RNA and protein metabolism genes differentially regulated after wounding in WT and LapA-SI tomato leaves. (XLSX) [file pone.0077889.s007.xlsx]

## Sheet: Sheet1
Table S6. RNA and protein metabolism genes differentially regulated after wounding in WT and LapA-SI tomato leavesA.
								WT								LapA-SI
					0 hr		1	hr		8	hr		0 hr		1	hr		8	hr
	Bin Number	Bin Description	Clone ID	DescriptionC			Local	Systemic		Local	Systemic				Local	Systemic		Local	Systemic
RNA Metabolism
1 hr only	27.1	RNA.processing	STMGO76	similar to Poly(A) polymerase	0.0259794		0.845096	0.099994		0.581815	0.44885		-0.153596		0.994405	0.264514		0.513244	0.67459
	27.2	RNA.transcription	STMDB40	similar to chloroplast sigma factor A (SIG1)	-0.0689355		-0.932011	-0.224476		-0.731696	-0.500715		0.0908606		-0.460718	0.0230821		-0.531611	-0.484007
	27.3.22	RNA.regulation of transcription.HB,Homeobox transcription factor family	STMHT30	similar to homeobox-leucine zipper protein 7 (HB-7)	-0.0600832		0.804434	0.317474		0.411085	0.0728015		0.4028		0.956866	0.323598		0.591392	0.391009
	27.3.27	RNA.regulation of transcription.NAC domain transcription factor family	STMFB46	similar to NAC domain protein NAC2	0.0780254		1.04863	-0.0650275		0.393486	-0.413041		0.394751		0.114457	-0.230491		0.375485	-0.469636
	27.3.29	RNA.regulation of transcription.TCP transcription factor family	STMJE94	weakly similar to Cycloidea protein, TCP family transcription factor	0.141151		1.05512	0.448989		0.213593	0.235618		0.136596		1.20523	0.583592		0.54682	0.283942
	27.3.3	RNA.regulation of transcription.AP2/EREBP, APETALA2/Ethylene-responsive element binding protein family	STMFB78	Ethylene-responsive transcription factor ABR1	0.057937		1.16676	0.3952		0.444732	0.0160461		0.430994		0.802701	0.19139		0.0893386	-0.0319628
	27.3.3	RNA.regulation of transcription.AP2/EREBP, APETALA2/Ethylene-responsive element binding protein family	STMJN16	similar to Ethylene-responsive transcription factor RAP2-7	-0.0184183		1.58463	0.185368		0.460232	0.463493		-0.0485095		1.5757	0.5288		0.262661	0.715243
	27.3.30	RNA.regulation of transcription.Trihelix, Triple-Helix transcription factor family	STMCH76	similar to GT-2 factor (Fragment)	-0.074525		0.845501	0.183974		0.237957	-0.0551942		0.305306		0.405013	-0.106744		0.188572	-0.466873
	27.3.32	RNA.regulation of transcription.WRKY domain transcription factor family	STMFB09	homologue to AtWRKY75/StWRKY1 (potato SGN-U273670)	0.290573		0.881278	0.410104		0.463891	0.14623		0.545098		0.250386	0.0822567		0.198399	-0.0076518
	27.3.32	RNA.regulation of transcription.WRKY domain transcription factor family	STMCN79	homologue to ATWRKY33	0.157739		1.09777	0.213623		0.240352	0.437201		0.263035		0.76492	0.156289		-0.16933	-0.585189
	27.3.32	RNA.regulation of transcription.WRKY domain transcription factor family	STMIW03	similar to ATWRKY40	-0.00652735		1.36062	-0.0108372		-0.300019	-0.0398711		-0.290867		1.36631	0.166452		-0.0533255	-0.0235367
	27.3.62	RNA.regulation of transcription.Nucleosome/chromatin assembly factor group	STMDH93	weakly similar to DDT domain-containing protein	0.11811		0.870421	0.343893		0.340357	0.0456835		0.842658		-0.00733344	0.0990358		-0.227835	-0.0443531
	27.3.67	RNA.regulation of transcription.putative DNA-binding protein	STMEM46	weakly similar to transcription elongation factor-related	0.0799599		0.966513	0.107916		0.557367	0.518801		-0.000552238		0.777649	0.298908		0.480192	0.634715
	27.3.8	RNA.regulation of transcription.C2C2(Zn) DOF zinc finger family	STMCK07	similar to DNA binding protein	0.206307		1.14528	0.28387		0.370559	0.133319		0.568166		0.708728	0.269158		0.115329	0.0848462
	27.3.8	RNA.regulation of transcription.C2C2(Zn) DOF zinc finger family	STMDH55	similar to DNA binding protein	0.248837		1.25923	0.391373		0.226591	0.324266		0.659678		0.759975	-0.0523227		0.309698	0.0687372
	27.3.99	RNA.regulation of transcription.unclassified	STMCZ22	similar to ARF GAP-like zinc finger-containing protein ZIGA3 (ZIGA3)	0.180012		0.84492	0.469419		0.519067	0.294984		0.524294		0.421865	0.41468		0.0815881	0.165264
	27.3.99	RNA.regulation of transcription.unclassified	STMCC31	homologue to MRNA binding protein precursor	-0.0728516		-0.851697	-0.285141		-0.744615	-0.373588		-0.428792		-0.525292	0.074723		-1.1693	-0.403803
1 & 8 hr	27.2	RNA.transcription	STMCA66	similar to chloroplast sigma factor A (SIG1)	-0.1794		-1.06056	-0.358796		-0.942088	-0.745348		-0.108932		-0.629045	0.0271039		-0.946853	-0.617702
	27.1.19	RNA.processing.ribonucleases	STMDH65	Ribonuclease P family protein	0.258305		0.832477	0.00647004		1.60554	1.06216		0.0823295		0.644678	0.262557		1.27627	1.37051
	27.3.23	RNA.regulation of transcription.HSF,Heat-shock transcription factor family	STMCQ44	similar to Lil3 protein	-0.0732837		-0.836687	-0.130329		-1.2052	-0.643865		-0.278372		-0.714295	-0.111716		-1.14539	-0.622571
	27.3.35	RNA.regulation of transcription.bZIP transcription factor family	STMCU81	similar to BZIP transcription factor BZI-2	0.339413		1.17867	0.397997		0.956123	0.379289		0.232314		0.822279	0.653315		1.4313	0.868861
	27.3.6	RNA.regulation of transcription.bHLH,Basic Helix-Loop-Helix family	STMCN84	weakly similar to MYC protein	0.228423		1.32943	0.618006		0.807961	0.274559		0.584285		1.0376	0.196468		0.0215629	0.240191
	27.3.67	RNA.regulation of transcription.putative DNA-binding protein	STMGA35	putative DNA Binding	0.298248		0.8097	0.684926		0.918185	0.166602		0.961737		-0.0539385	0.196382		-0.0811282	-0.11955
	27.3.7	RNA.regulation of transcription.C2C2(Zn) CO-like, Constans-like zinc finger family	STMDB34	similar to zinc finger (B-box type) family protein	-0.134979		-1.40445	-0.304253		-1.24036	-0.996163		-0.114628		-1.20036	-0.202569		-1.32793	-1.12026
	27.3.7	RNA.regulation of transcription.C2C2(Zn) CO-like, Constans-like zinc finger family	STMHT65	similar to CONSTANS-like protein CO1	-0.196301		-0.950871	-0.612227		-1.0654	-1.18308		-0.201631		-0.663357	-0.482986		-1.15908	-1.28501
	27.3.99	RNA.regulation of transcription.unclassified	STMIY06	similar to Chloroplast RNA binding protein precursor	-0.210706		-0.860919	-0.426703		-1.04749	-0.462988		-0.54647		-0.568282	-0.137645		-0.658965	-0.390437
8 hr only	27.1	RNA.processing	STMFB51	similar to RNA-binding gricine-rich protein-1 (RGP-1c)	-0.00129862		0.287136	0.0886985		0.836426	0.824675		-0.00396193		-0.429984	-0.00366915		1.05143	0.869468
	27.1	RNA.processing	STMDV82	similar to RNA-binding protein	0.0281761		0.443418	0.290535		0.857552	0.358878		0.140063		0.0949318	0.197348		0.576714	0.637731
	27.1	RNA.processing	STMDZ02	similar to RNA-binding protein	0.07729		0.357419	0.269148		0.913192	0.396277		0.108909		0.0567808	0.130089		0.71379	0.756752
	27.1	RNA.processing	STMCX26	similar to RNA-binding protein	0.0765888		0.382553	0.0857839		1.01794	0.466924		0.143167		0.146308	0.235439		0.752748	0.675722
	27.1.1	RNA.processing.splicing	STMGZ96	similar to arginine/serine-rich splicing factor RSP31	0.14754		0.402136	0.176554		0.863303	0.541392		0.282048		0.139497	0.197793		0.800493	0.760856
	27.3.14	RNA.regulation of transcription.CCAAT box binding factor family, HAP2	STMGO41	similar to CCAAT-binding transcription factor (CBF-B/NF-YA)	-0.0755767		0.176113	-0.133108		0.995118	0.36506		-0.0677947		-0.0248065	-0.0998357		0.647575	0.38433
	27.3.23	RNA.regulation of transcription.HSF,Heat-shock transcription factor family	STMHO25	similar to Lil3 protein	-0.0846994		-0.714572	-0.154041		-0.865902	-0.492842		-0.4025		-0.425705	-0.000611654		-0.982008	-0.444969
	27.3.32	RNA.regulation of transcription.WRKY domain transcription factor family	STMHA17	homologue to AtWRKY13	0.194387		0.161882	0.153634		1.36179	1.50956		0.0350785		0.0626723	0.0175287		1.43968	1.67645
	27.3.35	RNA.regulation of transcription.bZIP transcription factor family	STMEP60	similar to NPR1-interactor protein 1 TGA2	-0.123546		0.773301	-0.0292305		0.862294	-0.277801		0.218295		0.283594	-0.257541		1.09952	-0.716735
	27.3.40	RNA.regulation of transcription.Aux/IAA family	STMGW46	homologue to Nt-iaa28 deduced protein, AUX_IAA, AUX/IAA family	-0.315764		-0.722288	-0.357603		-1.03379	-0.288992		-0.536816		-0.38963	-0.196734		-0.608081	-0.32735
	27.3.40	RNA.regulation of transcription.Aux/IAA family	STMDP46	homologue to Nt-iaa2.3 deduced protein, AUX_IAA, AUX/IAA family	-0.0970869		-0.231378	0.117446		-0.891841	-0.401529		-0.0232292		-0.116234	0.00341144		-0.649786	-0.354443
	27.3.41	RNA.regulation of transcription.B3 transcription factor family	STMFB49	weakly similar to B3 DNA binding domain transcription factor	-0.0502318		-0.391641	0.132026		-0.826228	-0.165657		0.076697		-0.652468	0.00927203		-1.17813	-0.340093
	27.3.67	RNA.regulation of transcription.putative DNA-binding protein	STMJH25	similar to remorin family protein	-0.201544		-0.675569	-0.381476		-1.09722	-0.585186		-0.612128		-0.299959	-0.0527759		-0.94875	-0.497812
	27.3.69	RNA.regulation of transcription.SET-domain transcriptional regulator family	STMJP20	similar to SET-domain-containing protein	-0.102458		-0.634924	-0.143855		-1.21094	-0.803967		-0.186581		-0.31019	0.000180252		-1.22624	-0.735886
	27.3.8	RNA.regulation of transcription.C2C2(Zn) DOF zinc finger family	STMDM43	similar to Ascorbate oxidase promoter-binding protein	-0.00593507		-0.301617	-0.098918		-0.985391	-1.27457		0.303686		-0.801083	0.0893306		-1.2131	-1.25607
	27.3.99	RNA.regulation of transcription.unclassified	STMDH86	homologue to RCD1, Cell differentiation family	0.236606		0.551257	0.240702		0.844312	0.512741		0.643526		0.179289	0.0707785		0.51527	0.696765
	27.3.99	RNA.regulation of transcription.unclassified	STMHQ48	similar to transducin family protein	0.358506		0.20782	0.030386		1.85784	2.03086		-0.0277008		0.112727	0.114424		2.22731	2.23505
	27.3.99	RNA.regulation of transcription.unclassified	STMCK27	LeArcA1 protein, guanine nucleotide-binding family protein	0.345176		0.401355	0.466956		3.32628	3.66385		0.119912		0.263761	0.31476		3.28737	3.97774
8 hr Systemic Only	27.3.11	RNA.regulation of transcription.C2H2 zinc finger family	STMGT55	similar to zinc finger (C2H2 type) family protein	-0.0231758		-0.381647	0.067828		0.568551	0.879833		-0.532869		-0.0525035	0.2911		0.863993	1.11233
	27.3.22	RNA.regulation of transcription.HB,Homeobox transcription factor family	STMEF08	homologue to Homeobox DNA-binding factor	0.0488601		-0.729365	-0.300279		0.497309	0.880641		-0.640143		-0.682288	-0.00717131		-0.232701	1.05747
	27.3.8	RNA.regulation of transcription.C2C2(Zn) DOF zinc finger family	STMCY67	similar to Ascorbate oxidase promoter-binding protein	-0.00781073		-0.301353	-0.0987416		-0.782496	-0.898701		0.275734		-0.445347	0.176818		-1.06117	-0.922484
LapA-SI only
0 hr	27.3.22	RNA.regulation of transcription.HB,Homeobox transcription factor family	STMGF04	similar to Homeodomain protein GhHOX1	-0.0135597		0.424147	0.557842		0.653247	0.0706318		0.831642		-0.224521	0.0628642		-0.0967899	-0.167095
	27.3.22	RNA.regulation of transcription.HB,Homeobox transcription factor family	STMGB83	similar to F6F9.25 protein (BEL1-like homeodomain 5 protein)	0.0586488		0.713631	0.598695		0.729835	-0.00983932		0.887391		-0.119954	0.0417754		0.0232206	-0.298369
	27.3.26	RNA.regulation of transcription.MYB-related transcription factor family	STMDH75	similar to MYB family transcription factor	0.212614		0.496763	0.324716		0.408059	0.0157831		0.860137		-0.42079	-0.103522		-0.0245958	-0.138211
	27.3.6	RNA.regulation of transcription.bHLH,Basic Helix-Loop-Helix family	STMGB18	weakly similar to DNA-binding protein-like	0.132694		0.421807	0.520128		0.735679	0.214305		0.881142		-0.233714	0.00710239		0.107716	0.051923
1 hr only	27.3.11	RNA.regulation of transcription.C2H2 zinc finger family	STMFB31	similar to Zinc finger protein PIF1	0.0989079		0.518258	0.0829564		0.0487004	0.535985		0.0601355		0.906715	-0.0982422		-0.448516	-0.019866
	27.3.15	RNA.regulation of transcription.CCAAT box binding factor family, HAP3	STMDQ49	homologue to transcription factor, CCAAT-binding, chain A	-0.292446		-0.529107	-0.170532		-0.612328	-0.225102		-0.62419		-0.907615	-0.102019		-0.367731	-0.438736
	27.3.27	RNA.regulation of transcription.NAC domain transcription factor family	STMIY82	homologue to Jasmonic acid 2	-0.183361		0.660284	-0.0800714		0.0120468	-0.258764		-0.416003		0.882442	-0.0846727		0.748268	-0.245612
	27.3.32	RNA.regulation of transcription.WRKY domain transcription factor family	STMJC11	homologue to WRKY-type transcription factor	0.0476897		0.264165	-0.0435168		-0.22875	-0.11835		-0.0886591		0.809686	-0.171823		-0.102877	-0.00717922
	27.3.32	RNA.regulation of transcription.WRKY domain transcription factor family	STMJD75	similar to WRKY transcription factor 6	-0.0612758		0.758409	-0.0300142		0.233427	0.0657331		0.018005		0.979585	-0.296171		0.340843	0.00807067
	27.3.59	RNA.regulation of transcription.Methyl binding domain proteins	STMCI93	similar to methyl-CpG-binding domain-containing protein	-0.0550258		-0.343177	-0.0758939		-0.0618971	0.067799		0.168391		-0.813076	-0.179907		-0.282753	-0.16433
	27.3.6	RNA.regulation of transcription.bHLH,Basic Helix-Loop-Helix family	STMGI14	homologue to MYC transcription factor	0.0746409		0.638619	0.161741		0.380422	0.647853		0.0379343		0.974811	0.299405		0.334952	0.542971
	27.3.6	RNA.regulation of transcription.bHLH,Basic Helix-Loop-Helix family	STMGY33	MYC transcription factor	0.0440437		0.415798	-0.0524706		0.415117	0.606811		-0.137101		0.990474	0.269497		0.250825	0.625667
	27.3.6	RNA.regulation of transcription.bHLH,Basic Helix-Loop-Helix family	STMCU25	weakly similar to MYC protein	-0.123122		0.77424	0.262384		-0.0200863	0.00199043		0.0237433		1.01758	0.322522		0.139191	0.131279
	27.3.64	RNA.regulation of transcription.PHOR1	STMGX55	similar to Avr9/Cf-9 rapidly elicited protein 74, RING finger containing	0.0640723		0.782464	0.198635		0.185279	-0.0405693		0.262077		0.83929	0.0293265		0.267698	-0.140521
8 hr only	27.3.21	RNA.regulation of transcription.GRAS transcription factor family	STMDT03	weakly similar to scarecrow-like transcription factor 11 (SCL11)	0.0279303		-0.466736	-0.429461		-0.557885	-0.475546		-0.0729041		-0.0521113	-0.583171		-1.13858	-1.14327
	27.3.22	RNA.regulation of transcription.HB,Homeobox transcription factor family	STMJL63	similar to Homeobox-leucine zipper protein	0.0372955		0.34771	-0.397222		0.563006	0.357564		0.309106		0.741378	0.209737		0.876147	0.651175
	27.3.23	RNA.regulation of transcription.HSF,Heat-shock transcription factor family	STMIN23	similar to heat shock transcription factor	0.109187		0.477444	0.0720052		0.159616	0.137732		0.288803		0.152408	0.0154656		0.801883	-0.0405302
	27.3.25	RNA.regulation of transcription.MYB domain transcription factor family	STMCA87	homologue to Myb-like DNA-binding protein	-0.159108		-0.793486	-0.0335244		-0.752355	-0.27996		-0.244083		-0.485297	-0.0130628		-1.01787	-0.177473
	27.3.36	RNA.regulation of transcription.Argonaute	STMCE02	weakly similar to Piwi protein	0.200698		0.101356	0.255014		-0.749135	-0.383393		0.458605		-0.0826207	0.0795534		-0.876473	-0.832474
	27.3.44	RNA.regulation of transcription.Chromatin Remodeling Factors	STMES33	Adenosine A3 receptor, identical to MOM1 (mutation in a 'Morpheus molecule')	-0.119972		-0.690459	-0.0559863		-0.646488	-0.35725		-0.132195		-0.49985	0.111048		-1.14636	-0.240498
	27.3.59	RNA.regulation of transcription.Methyl binding domain proteins	STMID61	weakly similar to PHD finger-like protein	-0.245526		-0.540685	-0.465651		-0.614203	-0.766019		-0.49395		-0.193776	-0.18237		-0.908296	-0.75895
	27.3.6	RNA.regulation of transcription.bHLH,Basic Helix-Loop-Helix family	STMCO64	similar to basic helix-loop-helix (bHLH) family protein	0.0889527		-0.044949	0.224963		-0.292541	-0.604948		0.384539		-0.374356	0.105789		-0.890178	-0.649885
	27.3.73	RNA.regulation of transcription.Zn-finger(CCHC)	STMGN12	similar to TUDOR, RNA-binding protein	-0.0121297		0.325745	0.062187		0.747952	0.484195		-0.054967		0.0610932	0.257862		0.808817	0.816309
	27.3.99	RNA.regulation of transcription.unclassified	STMDB23	MRNA binding protein precursor	0.0237562		-0.486849	0.0315424		-0.467034	-0.34913		0.186252		-0.582702	0.105949		-0.864857	-0.426779
	27.3.99	RNA.regulation of transcription.unclassified	STMCR44	MRNA binding protein precursor	0.084256		-0.571985	-0.0975023		-0.576214	-0.472561		0.196045		-0.579837	-0.066735		-1.0616	-0.338774
8 hr Systemic Only	27.3.12	RNA.regulation of transcription.C3H zinc finger family	STMGW14	similar to zinc finger (CCCH-type) family protein	0.0652036		-0.036317	0.182085		0.72968	0.620982		0.219729		-0.136025	0.380874		0.601124	0.883131
	27.3.62	RNA.regulation of transcription.Nucleosome/chromatin assembly factor group	STMCN34	similar to WD-40 repeat protein (MSI2)	0.139531		0.183988	0.147181		0.316534	0.692802		0.00225121		0.701875	0.462416		0.361518	0.908962
Protein Metabolism
1 hr only	29.2.2	protein.synthesis.misc ribosomal protein	STMDH15	homologue to 40S ribosomal protein	0.269792		0.852019	0.627646		0.219574	0.150798		0.72507		0.0111746	0.233729		0.168487	-0.00875225
	29.2.4	protein.synthesis.elongation	STMJD89	similar to Elongation factor TS	-0.301582		-0.830737	-0.197886		-0.533184	-0.0102602		-0.352159		-0.57698	-0.152799		-0.184335	-0.0982197
	29.4	protein.postranslational modification	STMDH09	homologue to Osmotic stress-activated protein kinase	0.242141		0.945747	0.610392		0.342746	0.159343		0.783356		0.0439357	0.164541		0.071606	0.0319781
	29.4	protein.postranslational modification	STMHS17	similar to Protein phosphatase 2C	0.0697368		1.29723	0.228183		0.435011	0.023764		-0.0854543		1.30483	0.397275		0.813913	0.0738614
	29.5.1	protein.degradation.subtilases	STMDZ58	homologue to SBT2 protein (Subtilisin-like protease)	-0.0966737		-1.10628	-0.304822		-0.722242	0.0805949		-0.330687		-0.439684	0.0795656		-0.532361	0.218139
	29.5.11.4.2	protein.degradation.ubiquitin.E3.RING	STMIQ20	similar to IBR, In Between Ring fingers	-0.0715886		1.2841	0.420034		-0.544336	-0.204893		-0.28186		1.16066	0.225034		-0.137555	-0.220157
	29.5.11.4.3.2	protein.degradation.ubiquitin.E3.SCF.FBOX	STMEN90	similar to Kelch repeat-containing F-box family protein	0.0286669		0.914734	-0.0535636		0.227283	-0.146368		-0.359669		0.839878	0.166623		0.380853	-0.389378
	29.5.4	protein.degradation.aspartate protease	STMIY85	similar to aspartyl protease family protein	0.0821496		1.09073	0.108679		-0.073343	-0.421348		-0.138768		1.15271	0.109204		0.0696098	-0.836072
	29.6	protein.folding	STMGG82	homologue to Hsp70 protein	0.0670176		0.812717	0.329626		-0.121635	-0.384331		0.452855		0.654157	0.464336		-0.0839008	-0.252722
	29.6	protein.folding	STMCH67	homologue to Hsp70 protein	0.13329		1.46935	0.236145		0.0134266	-0.185172		0.126413		0.817911	0.467056		0.0700411	-0.234975
	29.7	protein.glycosylation	STMGH29	similar to Galactosyltransferase	0.199598		0.82434	0.431863		0.432361	0.0338066		0.586719		0.223712	0.21569		-0.0292427	-0.0520754
1 & 8 hr	29.2.1.1	protein.synthesis.chloroplast/mito - plastid ribosomal protein.plastid	STMCU43	weakly similar to 50S ribosomal protein L34, chloroplast precursor	0.00172499		-0.880259	-0.0789456		-1.11412	-0.579988		-0.174778		-0.825526	0.202724		-1.41057	-0.76395
	29.2.1.1	protein.synthesis.chloroplast/mito - plastid ribosomal protein.plastid	STMIW46	similar to ribosomal protein 30s	-0.181805		-0.956514	-0.169258		-0.89697	-0.0868101		-0.28444		-0.574979	-0.00973819		-1.1051	-0.221486
	29.2.1.1	protein.synthesis.chloroplast/mito - plastid ribosomal protein.plastid	STMHI26	similar to ribosomal protein S17	-0.168426		-0.946517	-0.330942		-0.809005	-0.224593		-0.610513		-0.641302	0.0514193		-0.75675	-0.179101
	29.2.2	protein.synthesis.misc ribosomal protein	STMJA14	similar to 60S ribosomal protein L36	-0.288037		-1.09847	-0.46462		-2.55274	-1.67968		-0.422003		-0.547015	-0.134634		-2.58565	-1.65208
	29.2.2	protein.synthesis.misc ribosomal protein	STMCC66	Type I (26 kD) CP29 polypeptide, 60S ribosomal protein L7A (RPL7aB)	-0.33342		-1.20716	-0.501088		-1.93218	-1.07514		-0.568781		-0.497669	-0.0832055		-2.04696	-0.962072
	29.3.4.3	protein.targeting.secretory pathway.vacuole	STMCV50	similar to vacuolar sorting receptor	0.174328		0.831918	0.304393		1.42513	1.044		0.20012		0.295416	0.421619		1.56784	1.42568
	29.4.1.56	protein.postranslational modification.kinase.receptor like cytoplasmatic kinase VI	STMCQ49	weakly similar to protein kinase family protein	0.167993		0.949003	0.665176		0.875657	1.40616		-0.100585		1.21181	0.804147		1.02199	1.71597
	29.5.11.1	protein.degradation.ubiquitin.ubiquitin	STMGC93	Ubiquitin	0.163311		0.906485	0.570233		0.969775	0.0954108		0.460857		0.405382	0.320822		0.587504	-0.0127983
	29.5.11.4.2	protein.degradation.ubiquitin.E3.RING	STMJO85	weakly similar to Zinc finger (C3HC4) protein	-0.0785581		-0.994781	-0.273458		-2.18376	-1.52198		-0.0709997		-0.694729	0.0608343		-2.59561	-1.40658
	29.5	protein.degradation	STMCR61	Neutral leucine aminopeptidase preprotein precursor	0.475657		1.1707	0.0736456		2.34551	2.35585		-0.102411		-0.477299	-0.30093		-0.486898	-0.561813
	29.5	protein.degradation	STMGC30	Leucine aminopeptidase A	0.485216		0.998926	0.0157602		2.79873	2.67208		-1.21346		-0.660111	-0.617671		-0.96968	-0.792805
	29.5.3	protein.degradation.cysteine protease	STMGC07	similar to Cathepsin B-like cysteine proteinase	-0.0104543		0.862768	0.212591		1.01817	0.493023		0.346666		0.367691	0.0245986		1.45325	0.889485
	29.5.3	protein.degradation.cysteine protease	STMJB45	homologue to Cathepsin B-like cysteine proteinase	-0.00109504		0.907989	0.0597502		1.02725	0.77453		-0.182689		0.681251	0.238809		1.99691	1.24076
	29.5.5	protein.degradation.serine protease	STMCK62	weakly similar to serine carboxypeptidase S10 family protein	0.0809677		0.952911	0.142393		1.07357	-0.0661849		0.661179		0.522447	0.0447813		1.2664	0.156753
1 hr Systemic & 8 hr	29.5.15	protein.degradation.inhibitors	STMCM05	homologue to probable protease inhibitor P322	0.455148		0.497209	0.824885		2.5524	2.68075		0.541585		0.325007	0.33101		2.34033	2.82474
8 hr only	29.1	protein.aa activation	STMCC51	similar to Palmitoyl protein thioesterase	-0.300888		-0.742533	-0.356885		-1.06827	-0.310151		-0.505617		-0.240732	-0.076289		-0.837027	-0.291717
	29.2.1.1	protein.synthesis.chloroplast/mito - plastid ribosomal protein.plastid	STMCF33	similar to 30S ribosomal protein S1, chloroplast precursor (CS1)	-0.0681522		-0.504828	-0.100025		-0.883271	-0.74283		-0.117441		-0.130498	0.03938		-1.13209	-0.62839
	29.2.1.2	protein.synthesis.chloroplast/mito - plastid ribosomal protein.mitochondrial	STMCA58	similar to 50S ribosomal protein L21, mitochondrial (RPL21M)	0.100774		-0.0878371	-0.08684		1.5792	1.53427		-0.132843		-0.0418931	0.0934173		2.15585	1.9727
	29.2.1.99	protein.synthesis.chloroplast/mito - plastid ribosomal protein.unknown	STMCJ03	similar to ribosomal protein S5 family protein	-0.00503083		-0.0517276	0.0233532		-1.45347	-0.671519		0.0285815		-0.00155602	0.00474636		-1.7311	-0.527345
	29.2.2	protein.synthesis.misc ribosomal protein	STMHV38	homologue to 60S ribosomal protein L10 (EQM)	-0.164463		-0.615983	-0.298083		-1.57265	-0.934626		-0.476906		-0.41349	-0.0831061		-1.34534	-0.99799
	29.3.4.3	protein.targeting.secretory pathway.vacuole	STMCX65	homologue to Vacuolar processing enzyme-3	0.136962		0.235696	0.0897165		0.863487	0.133959		0.217168		0.114909	0.0910234		0.639109	0.22311
	29.4	protein.postranslational modification	STMDR26	homologue to Protein kinase, 41K	0.0996974		0.195182	-0.136672		1.15732	0.668521		-0.0198669		-0.224953	-0.136473		0.63849	0.739611
	29.4	protein.postranslational modification	STMEQ22	similar to Phototropin 2	-0.0698131		-0.502181	-0.31617		-1.03265	-0.852571		-0.0572675		-0.140335	-0.058198		-0.921529	-1.06715
	29.4	protein.postranslational modification	STMDP27	similar to SOS2-like protein kinase	-0.12684		0.0366336	-0.256627		-0.96954	-0.581523		-0.427062		0.364108	0.076107		-0.353301	-0.530196
	29.4	protein.postranslational modification	STMCU58	similar to Phototropin 2	-0.0912876		-0.48374	-0.266623		-0.88337	-0.871551		0.165847		-0.55025	-0.107376		-0.94853	-0.866603
	29.4.1.59	protein.postranslational modification.kinase.receptor like cytoplasmatic kinase IX	STMGF60	weakly similar to protein kinase family protein	0.0976644		0.664547	0.574051		0.95873	0.322584		0.913617		-0.134054	0.224612		0.0545524	-0.418337
	29.5.11.20	protein.degradation.ubiquitin.proteasom	STMCU19	homologue to Proteasome subunit alpha type 6	0.131287		0.319458	0.137404		1.08615	0.623117		-0.0279821		0.061736	0.146702		1.17796	0.857184
	29.5.11.4.2	protein.degradation.ubiquitin.E3.RING	STMHH47	similar to RING, Ring finger; E3 ubiquitin-protein ligase	0.236135		-0.00968394	0.0561089		1.46744	1.65756		-0.00171245		0.075439	0.169315		1.17741	1.76041
	29.5.11.4.3.2	protein.degradation.ubiquitin.E3.SCF.FBOX	STMGG22	weakly similar to kelch repeat-containing F-box family protein	0.207107		0.742778	0.563309		0.849191	0.431108		0.660486		0.280485	0.274809		0.27032	0.404233
	29.5.11.4.3.2	protein.degradation.ubiquitin.E3.SCF.FBOX	STMHK75	similar to Tubby-like protein 3;F-box family protein	0.0966028		-0.426159	-0.593254		1.18792	1.41866		-0.552881		-0.184645	-0.206662		1.01929	1.72766
	29.5.11.4.3.2	protein.degradation.ubiquitin.E3.SCF.FBOX	STMHN37	weakly similar to Kelch repeat-containing F-box-like protein	0.392291		0.316946	0.00540708		3.1215	3.19544		-0.12872		0.137541	0.275187		3.53578	3.33067
	29.5.11.5	protein.degradation.ubiquitin.ubiquitin protease	STMEU27	similar to ubiquitin-specific protease 12 (UBP12)	-0.0553663		-0.519063	-0.224358		-1.57976	-1.26775		-0.032863		-0.227996	-0.0391815		-1.64368	-1.35759
	29.5.15	protein.degradation.inhibitors	STMJA26	Proteinase inhibitor II	0.0218852		-0.55055	-0.105889		0.844209	1.38314		-0.3154		-0.209253	-0.000506081		1.05448	1.57967
	29.5.15	protein.degradation.inhibitors	STMCG57	Metallocarboxypeptidase inhibitor Iia	0.28169		-0.0739387	0.431311		1.59406	1.85717		0.386419		-0.105781	0.187184		1.15256	1.94115
	29.5.15	protein.degradation.inhibitors	STMHT35	Proteinase inhibitor II	0.589551		0.195945	-0.0393907		2.74896	3.13667		-0.12807		0.38279	-0.0647552		3.26642	3.69634
	29.5	protein.degradation	STMDQ06	Neutral leucine aminopeptidase preprotein precursor	0.455311		0.706081	-0.332251		2.80982	2.65292		-1.77197		-0.496099	-0.661734		-1.11893	-0.697965
	29.5.15	protein.degradation.inhibitors	STMCQ55	homologue to Aspartic protease inhibitor 8 precursor (pi8)	0.806195		0.363779	0.0317196		3.18053	3.41214		0.0175125		0.265463	0.376103		2.46653	4.02018
	29.5.15	protein.degradation.inhibitors	STMIU61	Homologue to proteinase inhibitor I	0.200741		0.0531683	0.300648		3.28315	3.448		-0.409618		0.277293	0.273302		3.3592	3.82372
	29.5.15	protein.degradation.inhibitors	STMCO50	Homologue to proteinase inhibitor I	0.452914		0.568809	0.559407		3.41375	3.79952		0.195918		0.183052	0.418404		3.29402	3.80709
	29.5.3	protein.degradation.cysteine protease	STMCJ34	similar to Cysteine protease precursor	0.163297		0.316429	-0.205732		0.826204	0.893543		-0.120267		-0.428434	-0.160799		1.14732	0.781943
	29.5.3	protein.degradation.cysteine protease	STMEU11	homologue to Cathepsin B-like cysteine proteinase	-0.0149991		0.763835	-0.143166		1.04858	0.637065		-0.371839		0.610231	0.208268		2.04858	1.19736
	29.5.9	protein.degradation.AAA type	STMDF49	similar to AAA-type ATPase family protein, chaperone-like functions	-0.143931		0.446369	0.172906		-1.16438	-0.942664		0.101729		0.411812	0.0927473		-0.936947	-1.27181
	29.5.9	protein.degradation.AAA type	STMGM71	similar to AAA-type ATPase family protein, chaperone-like functions	-0.0647154		0.0862428	0.0631816		-0.850348	-0.737893		-0.136228		0.359441	0.075194		-0.759902	-0.870952
8 hr Systemic only	29.4	protein.postranslational modification	STMIT27	similar to Protein kinase	-0.267732		-0.661559	-0.492554		-0.680231	-0.915953		-0.348047		-0.436745	-0.264506		-0.832377	-0.941262
	29.5.15	protein.degradation.inhibitors	STMIX49	homologue to Cystatin, cysteine protease inhibitor	0.0675107		0.0727716	0.207578		0.511733	1.03549		-0.22445		0.201827	-0.0584856		0.454152	0.654886
LapA-SI only
0 hr only	29.2.4	protein.synthesis.elongation	STMGT05	homologue to elongation factor 1-alpha	-0.337332		-0.51257	-0.514843		-0.521867	-0.488515		-0.824216		-0.0497657	-0.319632		-0.102578	-0.319475
	29.5.11.4.2	protein.degradation.ubiquitin.E3.RING	STMCY59	similar to IBR, In Between Ring fingers	0.218541		0.428082	0.306335		0.104574	-0.151799		0.913795		0.419659	0.173091		-0.0483454	-0.448481
	29.5.4	protein.degradation.aspartate protease	STMCR83	weakly similar to aspartyl protease family protein	0.420999		0.60794	0.553916		0.491676	0.241329		1.44599		0.364522	0.337599		-0.24034	0.127943
1 hr only	29.4	protein.postranslational modification	STMHO79	similar to protein phosphatase 2C	0.0268952		0.587152	0.157524		0.0734925	-0.121815		-0.000590146		0.812431	0.211218		0.35266	-0.0899586
	29.4	protein.postranslational modification	STMDU54	homologue to MAP kinase phosphatase	-0.0869501		0.408232	-0.400644		0.0785169	-0.291044		-0.320726		0.862925	-0.0204536		0.0536336	-0.461772
	29.5.11.4.3.2	protein.degradation.ubiquitin.E3.SCF.FBOX	STMCA77	similar to F-box family protein	-0.247612		0.630271	0.258522		0.256902	0.142465		0.0879091		0.808272	-0.109765		0.19666	0.603948
	29.5.11.4.3.2	protein.degradation.ubiquitin.E3.SCF.FBOX	STMGU08	similar to Avr9/Cf-9 rapidly elicited protein 189	0.0277531		0.67457	0.0161565		-0.0950449	-0.0303134		-0.00941394		0.975634	0.0197064		0.0631705	-0.226988
	29.5.11.4.3.2	protein.degradation.ubiquitin.E3.SCF.FBOX	STMFB18	similar to Kelch repeat-containing F-box family protein	-0.244634		-0.630505	-0.180271		-0.253477	-0.253037		-0.100171		-0.904621	-0.291692		-0.409141	-0.773182
	29.6	protein.folding	STMCM21	similar to probable FKBP-type peptidyl-prolyl cis-trans isomerase 2, chloroplast precursor	0.0480765		-0.431077	-0.222222		0.390332	0.166467		0.300876		-0.8437	-0.341333		-0.125828	0.0257646
1 & 8 hr	29.2.1.1	protein.synthesis.chloroplast/mito - plastid ribosomal protein.plastid	STMCB75	similar to Ribosomal protein L1	-0.134185		-0.472266	-0.0967883		-0.526354	-0.204604		-0.638842		-1.00865	-0.408005		-1.2729	-1.14621
	29.2.1.1	protein.synthesis.chloroplast/mito - plastid ribosomal protein.plastid	STMCX09	similar to Ribosomal protein L1	0.0469989		-0.304	0.0331946		-0.408793	-0.155872		-0.573032		-0.912472	-0.211469		-1.08426	-0.969523
	29.5.11.4.3.2	protein.degradation.ubiquitin.E3.SCF.FBOX	STMFB16	similar to Kelch repeat-containing F-box family protein	-0.176584		-0.404121	-0.0531026		-0.0561355	-0.320584		0.283494		-0.993066	-0.309576		-0.49945	-0.814012
	29.5.5	protein.degradation.serine protease	STMJP52	similar to serin carboxypeptidase-like protein	0.0998141		0.637167	0.132683		0.522509	0.779054		-0.0435224		0.909512	0.557567		0.957257	1.06168
8 hr only	29.2.1.99	protein.synthesis.chloroplast/mito - plastid ribosomal protein.unknown	STMCG60	similar to plastid ribosomal protein L19,	-0.0911528		-0.549204	0.0294234		-0.548633	-0.217532		-0.0957007		-0.628769	0.0464707		-1.01922	-0.334247
	29.2.1.99	protein.synthesis.chloroplast/mito - plastid ribosomal protein.unknown	STMCZ29	homologue to 50S ribosomal protein L27, chloroplast precursor (CL27)	0.139923		-0.362243	0.0611088		-0.507862	-0.213095		-0.0573287		-0.577748	0.0974187		-0.828545	-0.153793
	29.2.2	protein.synthesis.misc ribosomal protein	STMER23	weakly similar to 60S ribosomal protein L13-1 (Cold induced protein C24A)	-0.064885		-0.0933352	-0.00846502		-0.448407	-0.648247		-0.187848		-0.342709	-0.190982		-0.837022	-0.833756
	29.2.3	protein.synthesis.initiation	STMEW29	similar to eukaryotic translation initiation factor 3 subunit 3	0.0226027		-0.129597	0.0600983		-0.739494	-0.534524		0.151949		-0.122778	-0.0123456		-0.928906	-0.579373
	29.4	protein.postranslational modification	STMIG40	similar to protein phosphatase type 2C	-0.0468507		-0.207461	0.0304651		-0.727695	-0.157467		-0.163919		-0.172753	0.00583517		-0.851948	-0.427189
	29.4	protein.postranslational modification	STMIM14	similar to protein kinase family protein / Ire1 homolog-2 (IRE1-2)	-0.20106		-0.47883	-0.0643242		-0.573685	-0.230862		-0.168802		-0.222562	-0.00431279		-0.824947	-0.20559
	29.5	protein.degradation	STMIX54	similar to ATP-dependent protease	-0.0395097		0.234788	-0.103112		0.297853	0.0202928		0.10448		0.640554	0.322882		1.20084	0.245221
	29.5.11.4.2	protein.degradation.ubiquitin.E3.RING	STMJF07	similar to RING, Ring finger; E3 ubiquitin-protein ligase	0.0263705		0.228635	-0.00555337		0.60305	0.0648769		0.0819098		0.261775	0.132244		0.835082	0.200117
	29.5.3	protein.degradation.cysteine protease	STMHO21	similar to Cathepsin B-like cysteine proteinase	-0.0460057		0.154165	-0.000430554		0.456253	0.358783		-0.210121		0.217744	-0.0317885		1.03564	0.534455
	29.5.3	protein.degradation.cysteine protease	STMEI96	similar to Cathepsin B-like cysteine proteinase	-0.0196288		0.412913	-0.0201112		0.745277	0.515308		-0.214737		0.365536	0.115171		1.34203	0.740051
	29.5.3	protein.degradation.cysteine protease	STMCI03	weakly similar to OTU-like cysteine protease	0.231952		-0.216806	0.251613		-0.479816	-0.12598		0.37139		-0.533619	0.284417		-0.873852	-0.243011
	29.6	protein.folding	STMCM38	similar to Peptidyl-prolyl cis-trans isomerase, chloroplast precursor	-0.0671747		-0.672721	-0.0541901		-0.607247	-0.202999		0.116138		-0.714481	0.0422884		-1.12743	-0.424615
8 hr Systemic only	29.3.4.3	protein.targeting.secretory pathway.vacuole	STMGI03	similar to vacuolar sorting receptor	0.0543913		0.275661	0.112574		0.55862	0.630667		-0.0282681		0.174076	0.120767		0.670928	0.955334
	29.4	protein.postranslational modification	STMCR96	similar to Serine/threonine kinase	0.0276719		0.281826	0.213711		-0.0451256	-0.276253		0.309647		-0.327987	-0.243739		-0.410732	-0.901071
	29.4	protein.postranslational modification	STMCZ26	similar to SOS2-like protein kinase	0.0262295		0.767216	0.31569		-0.553758	-0.490931		0.241943		0.563519	0.170521		-0.274345	-0.943568
	29.5.1	protein.degradation.subtilases	STMJP90	homologue to Subtilisin-like protease	0.00224193		-0.338479	-0.165647		0.715162	0.655801		0.0192217		-0.0331982	0.134126		0.539526	0.861911
	29.5.11.4.2	protein.degradation.ubiquitin.E3.RING	STMII86	similar to zinc finger (C3HC4-type RING finger) family protein	-0.217871		-0.322294	-0.550183		-0.324231	-0.469243		-0.220217		-0.666475	-0.592986		-0.632538	-0.839124
	29.5.11.4.2	protein.degradation.ubiquitin.E3.RING	STMIA79	similar to zinc finger (C3HC4-type RING finger) family protein	-0.286506		0.56376	0.0994026		-0.347944	-0.34904		-0.512846		0.0659204	-0.168478		0.217895	-0.913257
A DEGs are indicated in bold and defined as those genes with |FC| ≥0.8, p<0.05. Up- and down-regulated genes are highlighted in blue and red, respectively.
B The DEGs in this table were not manually annotated and genes with duplicate spots or gene family member-specific spots were not determined.
