# Supplementary material for: Microarray Analysis of Tomato’s Early and Late Wound Response Reveals New Regulatory Targets for Leucine Aminopeptidase A
Source: PLoS One. 2013 Oct 24;8(10):e77889. doi: 10.1371/journal.pone.0077889 (PMC3812031; doi:10.1371/journal.pone.0077889)
Supplement: Table S7 — General metabolism genes differentially expressed in WT and LapA-SI leaves after wounding. (XLSX) [file pone.0077889.s008.xlsx]

## Sheet: Sheet1
Table S7. General metabolism genes differentially expressed in WT and LapA-SI leaves after woundingA.
							WT								LapA-SI
				0 hr		1	hr		8	hr		0 hr		1	hr		8	hr
BIN Name	BIN Number	Clone IDB	Annotation			Local	Systemic		Local	Systemic				Local	Systemic		Local	Systemic
Cell Wall	10.6.3	STMEA11*	LeXYL1 protein (β‐d‐xylosidase)	-0.256767		-1.1541	-0.599079		-0.486046	-0.631758		-0.210924		-1.23913	-0.593388		-0.927943	-0.914046
	10.6.3	STMIQ06	LeXYL2 protein (β‐d‐xylosidase)	-0.154212		-0.963775	-0.516075		-0.339211	-0.3342		-0.348708		-0.841252	-0.550792		-0.746931	-0.67221
	10.7	STMEP06	Similar to BR-regulated protein BRU1 (Xyloglucan Endotransglycosylase; XTH16)	0.0160313		-0.8759	-0.490444		-1.80423	-0.927839		-0.498604		-0.813684	-0.301529		-1.26757	-1.2417
	10.7	STMEI79	Probable xyloglucan endotransglucosylase/hydrolase 1 (LeXTH1)	-0.0900479		-0.33032	-0.118896		-1.06135	-0.594399		-0.377014		-0.692138	-0.114594		-1.32575	-1.07252
	10.7	STMCV68	Xyloglucan endotransglucosylase-hydrolase (XTH7)	-0.136313		-0.721624	-0.266421		-0.894755	-0.461983		0.0670803		-0.689792	-0.355261		-1.14114	-1.21292
	10.7	STMCX13	Homologue to xyloglucan endotransglucosylase-hydrolase (XTH5)	-0.161036		-0.126984	-0.569425		-0.594993	-1.11226		0.047552		-0.785655	-0.589375		-0.533485	-1.39714
	10.6.3	STMGL07	Homologue to pectate lyase	-0.338002		-1.06245	-0.620484		-0.905347	-0.50547		-0.781243		-0.620215	-0.496299		-0.82681	-0.710768
	10.5.2	STMGL17	Homologue to proline-rich protein	0.0437625		-0.795526	-0.620929		-1.2828	-0.501087		-0.493813		-0.498216	-0.0954299		-0.845518	-0.531645
	10.5.2	STMJI39	Homologue to proline-rich protein	0.0751751		-0.398876	-0.638917		-0.859828	-0.412785		-0.321995		-0.375569	-0.129221		-0.666142	-0.45557
Lipid Metabolism	11.9.2	STMEU40	Similar to Lipase-like protein	0.0118983		0.825561	0.105308		1.46262	1.08246		-0.0359248		0.461059	0.107963		1.06662	1.14974
	11.2	STMGH41	Homologue to FAD2 (FAD2.1)	0.284623		0.877735	0.254106		0.585669	0.180156		1.15078		0.722845	0.216044		0.674225	0.0785776
	11.2	STMES31	Homologue to FAD2 (FAD2.2)	0.0220304		-0.513376	-0.066494		-1.32553	-0.952616		0.11861		-0.347168	0.132167		-1.65041	-1.07277
	11.2	STMCP71	Delta 9 desaturase (homologue to FAD5)	0.00739505		-0.320758	0.0975205		-1.42455	-1.34107		0.352471		-0.122037	0.346761		-1.40647	-1.82443
	11.2	STMEI66*	Similar to plastidial delta-12 oleate desaturase; FAD6	-0.106094		-0.295748	-0.0878863		-1.97602	-1.33348		0.120078		-0.156442	0.0550656		-1.53489	-1.60166
Amino Acid Synthesis	13.1.1	STMCG42*	Similar to alanine:glyoxylate aminotransferase	-0.119896		-0.916676	-0.47563		-0.238729	-0.786766		-0.225546		-0.647936	-0.475995		-0.473362	-0.473362
	13	STMEY02	Similar to putative alanine aminotransferase	-0.20238		-0.735998	-0.242651		-0.831239	-0.775985		-0.301775		-0.28191	-0.349377		-0.822481	-0.937257
	13	STMCE75	Similar to anthranilate synthase alpha subunit (AS1)	0.0390213		0.266279	-0.0306724		0.829663	0.231106		0.26992		-0.219128	-0.258493		0.258318	0.20353
	13.1.3.4	STMCJ60*	S-adenosylmethionine synthetase 1	0.0388341		0.396702	0.0241419		1.27843	0.800514		0.0331196		0.439303	0.38946		1.10352	1.26088
	13.1.1	STMCJ20	Gamma-aminobutyrate transaminase isozyme 1	0.188352		1.04198	0.35471		0.631395	0.348694		0.114033		0.640947	0.448441		0.806659	0.499771
	13.1.1	STMGU10	Homologue to gamma-aminobutyrate transaminase isozyme 2	0.0698241		-0.251778	0.0774031		0.591311	0.904402		-0.335101		0.0681517	0.398597		1.14268	1.25777
	13.1.1	STMGU61*	Similar to probable acetylornithine aminotransferase	0.120821		1.49265	0.155545		1.55874	0.971689		-0.00654116		1.13467	0.218202		0.831308	0.831308
Isoprenoids	16.1	STMDU15*	Homologue to isopentenyl diphosphate isomerase 1	0.282388		0.260847	0.260847		1.13881	0.558305		0.294805		0.234771	0.323944		0.649118	0.80259
	16.1	STMEF65	Farnesyl pyrophosphate synthase	-0.187214		-0.900364	-0.900364		-0.717331	-0.212558		-0.442019		-0.410033	-0.325306		-0.820188	-0.184922
	16.1	STMCA79	Sesquiterpene synthase 1	-0.177924		-0.627721	-0.627721		-0.821103	0.0469649		-0.136883		-0.326085	0.11529		-0.420568	-0.0369092
	16.1	STMCV10*	Similar to phytoene synthase 1	-0.111444		-0.911411	-0.911411		-0.93024	-0.732895		-0.0584093		-0.605442	-0.00750324		-0.701609	-0.575921
	16.1	STMDH72	Homologue to b-carotene hydroxylase	-0.0748536		-0.398298	-0.398298		-1.21578	-0.942769		0.0360928		-0.258312	-0.113062		-1.02289	-1.37928
Phenylpropanoids	16.2	STMJE63*	Homologue to tyramine hydroxycinnamoyl transferase	-0.0218976		1.1326	-0.101659		0.526188	-0.078835		0.103235		0.922769	-0.24484		0.573614	-0.378921
	16.2	STMGC82	Weakly similar to 4-coumarate-CoA ligase-like	0.0592799		1.27101	0.543177		0.636046	0.170561		0.425037		0.661404	0.308621		0.31982	0.0420059
	16	STMCR27	Chorismate synthase 1	0.0874719		0.82358	0.365054		0.760799	0.324668		0.173596		0.168945	0.135964		0.291721	0.288017
	16.2	STMDR02	Similar to 4-coumarate-CoA ligase-like	0.133589		2.92132	0.840219		0.850193	0.389221		0.275654		2.44065	1.04514		0.652771	0.559135
	16.2	STMIY78*	Similar to 4-coumarate-CoA ligase-like protein	-0.36265		-0.969734	-0.85857		-2.06318	-1.52909		-0.785187		-0.364139	-0.776721		-1.67645	-2.08544
	16.2	STMCS41	Homologue to cinnamic acid 4-hydroxylase	0.0465691		1.44938	0.665487		0.881619	1.04334		-0.0713312		0.908894	0.677214		1.55235	1.45386
	16.2	STMIC76*	p-coumaroyl shikimate 3'-hydroxylase isoform 2	0.127151		0.868644	0.447141		1.22729	1.11247		-0.0494169		0.963453	0.642462		1.10742	1.58466
	16.2	STMES07	Homologue to hydroxycinnamoyl transferase	0.196071		0.933956	0.449629		1.39602	1.46644		-0.100562		0.645419	0.522901		1.3122	1.78648
	16.8	STMGP82*	Weakly similar to caffeoyl-CoA O-methyltransferase	0.292943		0.636619	0.250229		1.55006	1.58491		0.280041		0.578162	0.151648		1.60149	1.95687
	16	STMGC95	Weakly similar to 3-dehydroquinate dehydratase	0.121236		0.593282	0.591869		1.11638	0.860925		0.784266		-0.126689	0.114615		0.331301	0.689415
	16.2	STMDZ37	Similar to cinnamoyl-CoA reductase-like protein	0.0360523		0.515717	0.176959		1.17742	-0.0347859		0.784266		-0.126689	0.114615		0.331301	0.689415
	16.2	STMCC79	Similar to Caffeic acid 3-O-methyltransferase	-0.00109618		-0.478589	0.0396273		-0.865109	-0.194579		-0.12197		0.244126	0.286735		-0.3112	0.163654
Flavanoids	16.8	STMHP28	Homologue to chalcone synthase 2	-0.14415		-1.09413	-0.231189		-1.10647	-0.743194		-0.0863095		-0.442508	-0.197081		-1.10628	-0.806122
	16.8	STMCQ37	Weakly similar to leucoanthocyanidin dioxygenase-like protein	0.0480914		1.70926	0.510887		2.53164	1.35979		0.184587		1.43257	0.536712		2.53487	1.89423
	16.8	STMIU56	Similar to chalcone-flavonone isomerase	-0.214102		-0.457817	-0.0294341		-0.900731	-0.341512		-0.247448		-0.28037	0.0866176		-0.5718	-0.547958
	16.8	STMCK87	Similar to malonyltransferase	-0.0190089		0.130743	0.260982		-0.617948	-0.847732		0.369538		-0.583012	0.17704		-0.871738	-1.12359
Redox	21	STMCQ83	Superoxide dismutase [Cu-Zn] 1 (cytosolic)	0.12644		0.808544	0.58657		0.268168	-0.0292093		0.203569		0.526609	0.456081		0.617397	0.0186714
	21	STMJG34	Superoxide dismutase [Cu-Zn] 2 (plastid)	-0.181358		-0.692025	-0.19674		-1.09814	-0.286618		-0.437759		-0.256734	0.0720467		-0.424093	-0.0760987
	21	STMDC64	Homologue to putative glutathione peroxidase (multiple loc)	0.0153401		0.944673	0.385017		0.173139	-0.157433		0.160545		0.170338	0.05167		0.296535	-0.500082
	21	STMJA50*	Homologue to thioredoxin peroxidase	-0.123496		-0.797496	-0.339168		-0.822859	-0.264689		-0.307652		-0.263734	-0.0203458		-0.842553	-0.26187
	21	STMCV49	Similar to chloroplast thioredoxin	0.0780176		-0.216563	0.205328		-1.33556	-0.704089		0.258525		-0.526402	0.267582		-1.10145	-0.874158
	21	STMIS65	Probable glutathione S-transferase (cytosolic)	-0.347915		-0.427561	-0.325063		-1.09069	-0.620839		-0.45876		-0.119042	-0.301538		-0.761671	-0.859458
	21	STMEW65*	Catalase isozyme 2 (peroxisome)	-0.00457957		0.708057	-0.118061		1.79279	0.473803		0.236082		0.0855333	-0.331597		1.36493	0.542602
	10.7	STMGH65	Cytosolic ascorbate peroxidase	0.285118		0.672087	0.225517		1.51824	0.958627		0.21635		0.402109	0.390576		1.30311	1.14861
	21	STMDP29	Homologue to disulfide isomerase-like protein (ER/wall/vac)	0.0791362		0.306645	0.0229556		0.971599	0.486294		-0.176513		0.133991	0.275254		1.44406	0.969798
	21	STMDF17	Similar to protein disulfide-isomerase precursor (multiple loc)	0.146367		0.490716	0.202349		1.23549	1.21016		0.328925		0.224839	0.348002		1.17299	1.61958
Polyamines	22	STMCF12	Arginine decarboxylase	0.322163		1.00543	0.260321		0.771333	-0.0134586		0.702765		0.236357	0.0150106		0.0626606	-0.366896
	29.5	STMHR62*	Similar to N-acetylornithine deacetylase-like protein	0.156407		0.377367	0.0787153		1.98096	1.83547		-0.378675		0.679095	0.491552		1.84493	2.25636
	22	STMHW26	Similar to agmatine iminohydrolase	-0.282153		-0.912481	-0.204455		-0.969157	-0.344647		-0.420786		-0.408065	-0.00666767		-1.08683	-0.260171
	22	STMCV17*	Spermidine synthase	0.41355		0.835053	0.560723		2.16345	2.2131		0.321741		0.676637	0.640058		2.02467	2.73693
	22.1.2	STMIN52*	S-adenosylmethionine decarboxylase proenzyme	0.23783		0.553732	0.382724		2.06405	1.97701		0.0237767		0.652263	0.615114		2.74272	2.23934
	13	STMDV29	Ornithine decarboxylase	0.338344		0.409565	0.470947		0.665024	1.10942		0.0549391		0.744592	0.601574		0.500708	1.44873
A DEGs (|FC| ≥0.8; p < 0.05) are indicated in bold and shaded in grey. DEGs that are down regulated are boxed in.
B Some genes are represented by multiple clones on the TIGR 10-K (version 3) potato cDNA microarray. These genes are indicated with an asterisk. One representative clone shown. Redundant clones can be found in Table S4.
