# Supplementary material for: Microarray Analysis of Tomato’s Early and Late Wound Response Reveals New Regulatory Targets for Leucine Aminopeptidase A
Source: PLoS One. 2013 Oct 24;8(10):e77889. doi: 10.1371/journal.pone.0077889 (PMC3812031; doi:10.1371/journal.pone.0077889)
Supplement: Table S8 — Differentially expressed hormone metabolism and response genes after wounding in WT and LapA-SI leaves. (XLSX) [file pone.0077889.s009.xlsx]

## Sheet: Sheet1
Table S8. Summary of hormone metabolism and response genes differentially expressed in response to wounding in WT and LapA-SI leavesA.
						WT								LapA-SI
			0 hr		1	hr		8	hr		0 hr		1	hr		8	hr
BIN	Clone IDB	Description			Local	Systemic		Local	Systemic				Local	Systemic		Local	Systemic
17.1 Abscisic Acid
	STMGC08	9-cis-epoxy-carotenoid dioxygenase 2	0.109172		0.936041	0.338166		0.451134	0.421704		0.381224		0.820487	0.0846977		0.491285	0.416444
17.2 Auxin
	STMIW94*	Similar to IAA amidohydrolase-like	-0.0419772		1.72052	0.245767		0.0898243	0.0733699		0.0236764		1.61757	0.586512		0.393191	0.334575
	STMCM67	Similar to IAA-amino acid hydrolase 3	0.187372		1.84855	0.6728		2.77839	1.24184		0.224291		1.24744	0.571297		2.41406	1.73093
	STMGN14	Similar to IAA-amino acid hydrolase 6	0.129885		0.906617	0.328902		0.808795	0.87174		-0.041089		0.875765	0.623727		0.967882	1.09638
	STMDP46	Homologue to Nt-iaa2.3 deduced protein	-0.0970869		-0.231378	0.117446		-0.891841	-0.401529		-0.0232292		-0.116234	0.00341144		-0.649786	-0.354443
	STMGW46	Homologue to Nt-iaa28 deduced protein	-0.315764		-0.722288	-0.357603		-1.03379	-0.288992		-0.536816		-0.38963	-0.196734		-0.608081	-0.32735
	STMJA37*	Aromatic amino acid decarboxylase 1A	0.154978		0.764758	0.0392113		0.144834	0.825593		0.00139079		1.31318	0.0946231		0.125609	0.389238
17.3 Brassinosteroid
	STMGL44	Similar to squalene monooxygenase 1	-0.0677963		-0.482163	-0.356063		-0.924955	-0.662669		-0.122465		-0.0480406	0.00118843		-0.799191	-0.694554
	STMCQ85*	Homologue to putative C-8 7 sterol isomerase	0.196394		0.0213277	0.105363		1.24701	0.598858		-0.20134		0.0911919	0.342245		0.958602	1.12269
	STMGG42	DWARF1/DIMINUTO	0.123753		0.454646	0.3047		1.26731	0.816787		0.194693		0.130023	0.413187		0.861543	1.23804
	STMCF04*	Similar to DWARF1/DIMINUTO1	0.203472		0.325246	0.263714		1.33146	1.02943		0.0992754		0.179241	0.448737		1.47776	1.52456
	STMGY73	Steroid 5 alpha reductase (DET2)	0.167999		0.798425	0.409004		0.63319	0.703393		-0.147945		0.845988	0.559184		0.662383	1.02934
17.5 Ethylene
	STMER30	Homologue to aminocyclopropane-1-carboxylate oxidase	-0.148621		0.573233	-0.20833		0.92896	0.106598		-0.289883		0.440022	-0.0700114		1.23132	0.264663
	STMIK39	Homologue to ethylene response factor 5 (ER5)	-0.081804		-0.639407	-0.245636		0.0868933	0.911614		-0.0806366		-0.496675	-0.408472		-0.268369	0.125469
17.6 Gibberellic Acid
	STMCY85	Similar to ent-kaurenoic acid oxidase	0.216659		0.898664	0.440455		1.26363	0.96203		0.397138		0.467273	0.596122		1.38859	1.48629
	STMJC16*	GAST1 protein precursor	-0.201995		-1.3475	-0.317393		-0.985324	0.0716904		-0.484011		-0.449315	-0.224447		-1.11237	-0.071198
17.8 Salicylic Acid
	STMEP60	Similar to NPR1-interactor protein TGA2	-0.123546		0.773301	-0.0292305		0.862294	-0.277801		0.218295		0.283594	-0.257541		1.09952	-0.716735
A DEGs (|FC| ≥0.8; p <0.05) are indicated in bold and shaded in grey. DEGs that are down-regulated are boxed in.
B Some genes are represented by multiple clones on the TIGR 10-K (version 3) potato cDNA microarray. These genes are indicated with an asterisk. One representative clone shown. Redundant clones can be found in Table S3.
