# Supplementary material for: Microarray Analysis of Tomato’s Early and Late Wound Response Reveals New Regulatory Targets for Leucine Aminopeptidase A
Source: PLoS One. 2013 Oct 24;8(10):e77889. doi: 10.1371/journal.pone.0077889 (PMC3812031; doi:10.1371/journal.pone.0077889)
Supplement: Table S10 — Top 100 differentially expressed genes at 8 hr after injury of LapA-SI leaves relative to WT plants. (XLSX) [file pone.0077889.s011.xlsx]

## Sheet: Sheet1
Table S10. Top 100 differentially expressed genes at 8 hr after injury of LapA-SI relative to WT leaves A
BIN Number	BIN titleB	Clone name	Name	FCA	p-val
29	Protein (stress)C	STMDQ06	Neutral leucine aminopeptidase preprotein precursor	-3.92875	4.15348e-16
20	Stress	STMCP56	Catechol oxidase B, chloroplast precursor	-1.29756	0.251051
20	StressD	STMCI55	Polyphenol oxidase (similar to tomato PPO-B)	-1.11396	0.261546
35	Transport	STMCV94	Nucleoporin-like protein	-1.08568	0.239081
35	Not Assigned	STMEZ06	None	-1.03514	0.209855
35	Not Assigned	STMGF46	Similar to Os06g0298500	-1.02601	0.229844
33	Development	STMCY35	Hypothetical protein T11I11.190	-1.02425	0.144576
35	Not Assigned	STMCZ24	None	-1.02349	0.276205
28	DNA	STMGG77	Exonuclease-like protein	-1.01948	0.420944
27	RNA	STMGA35	Hypothetical protein	-0.999313	0.306523
35	Not Assigned	STMGA93	None	-0.969739	0.229844
35	Not Assigned	STMDH05	Hypothetical protein	-0.95614	0.495484
31	Cell	STMGG29	Hypothetical protein	-0.938397	0.209855
20	Stress	STMIB24	DnaJ-like protein	-0.922606	0.021853
35	Not Assigned	STMCP59	Domain of Unknown Function (DUF926)	-0.92179	0.752812
35	Not Assigned	STMCK71	T27I1.4 protein	-0.920933	0.0719327
20	Stress	STMCV60	Cysteine protease inhibitor 1 precursor	-0.913039	0.0729823
20	Stress	STMDU79	Polyphenol oxidase (similar to tomato PPO-D)	-0.911286	0.393463
31	Cell	STMGA77	Similar to kinesin-related protein (MKRP1)	-0.909562	0.361369
34	Transport	STMDJ91	Vacuolar ATP synthase subunit D	-0.907126	0.126724
35	Not Assigned	STMGB70	None	-0.904539	0.447375
29	Protein	STMGF60	U-box domain, putative	-0.904178	0.178361
35	Not Assigned	STMGA66	None	-0.903656	0.0898669
13	Amino acid metabolism	STMIT78	3-methylcrotonyl-CoA carboxylase alpha chain	-0.902105	0.432325
35	Not Assigned	STMCX60	None	-0.897644	0.229844
35	Not Assigned	STMGB22	Integral membrane family protein	-0.894412	0.34505
20	Stress	STMCV86E	Jasmonate ZIM-domain protein 3	-0.875046	0.0729823
35	Not Assigned	STMGV86	Similar to unknown protein	-0.871935	0.096003
35	Not Assigned	STMDZ77	Hcr9-OR3A	-0.863332	0.101721
31	Cell	STMCZ94	HOBBIT protein	-0.863222	0.414838
35	Not Assigned	STMCH84	None	-0.850936	0.353889
35	Not Assigned	STMGG94	Similar to LPD1 (Lipoamide dehydrogenase 1)	-0.848101	0.445132
35	Not Assigned	STMGA05	Similar to glycotransferase	-0.847442	0.450183
35	Not Assigned	STMCZ47	None	-0.843965	0.521123
35	Not Assigned	STMCE11	None	-0.839513	0.442737
27	RNA	STMCF95	Similar to Phytochrome Interacting Factor 3	-0.830995	0.354198
33	Development	STMGD80	Similar to latex allergen from Hevea brasiliensis	-0.826165	0.229844
20	Stress	STMGB30	Dehydration-responsive protein RD22 precursor	-0.807127	0.295585
35	Not Assigned	STMGB11	Polyunsaturated fatty acid synthase subunit A	-0.799052	0.517164
29	Protein	STMGD52	Kelch repeat-containing F-box family protein	-0.794299	0.320814
26	Misc	STMGH28	GDSL-motif lipase, putative	-0.791448	0.178361
16	Secondary metabolism	STMDZ37	Putative cinnamoyl-CoA reductase-like protein	-0.790636	0.599401
35	Not Assigned	STMCK05	WD-40 repeat family protein (nucleoporin SHE-1-like)	-0.790176	0.361369
35	Not Assigned	STMCR90	WD-40 repeat family protein (Transducin family protein)	-0.790042	0.327435
27	RNA	STMCN84	Transcription factor MYC7E	-0.786399	0.485709
13	Amino acid metabolism	STMGC95	3-dehydroquinate dehydratase / shikimate dehydrogenase isoform 2	-0.785077	0.539708
26	Misc	STMGG16	Short-chain dehydrogenase/reductase (SDR) family protein	-0.782975	0.174684
35	Not Assigned	STMGH27	Putative tyrosine-specific transport protein	-0.780506	0.578096
20	Stress	STMCR35	Proteinase inhibitor I	-0.778131	0.578096
35	Not Assigned	STMGC87	None	-0.775426	0.502455
29	Protein	STMCV88	Retrotransposon protein, putative, unclassified	-0.769229	0.229844
13	Amino acid metabolism	STMGA53	Ornithine carbamoyltransferase, chloroplast precursor	-0.766901	0.521123
35	Not Assigned	STMGD70	None	-0.764469	0.233616
26	Misc	STMER56	Invertase/pectin methylesterase inhibitor family protein	-0.76421	0.0719327
29	Protein	STMCH04	F-box family protein	-0.762871	0.511527
35	Not Assigned	STMCX88	Similar to nodulin-like protein	-0.757505	0.427022
35	Not Assigned	STMGG48	Similar to protein kinase	-0.757221	0.445132
27/33	RNA/Development	STMGF04	Homeodomain protein GhHOX1	-0.750037	0.476148
26	Misc	STMCH88	Flavin containing monooxygenase 3-like [Oryza sativa (japonica cultivar-group)]	-0.747807	0.535045
29	Protein	STMCB75	50S Ribosomal protein L1	-0.746546	0.000547582
35	Not Assigned	STMGH51	None	-0.73477	0.430855
35	Not Assigned	STMGB84	Probable carbohydrate esterase	-0.733536	0.412348
29	Protein	STMCR83	Putative aspartyl protease	-0.732016	0.389248
27	RNA	STMEF08	Homeobox	-0.73001	0.193239
33	Development	STMCM36	Cupin family protein	-0.729833	0.306523
29	Protein	STMCK53	None	-0.729381	0.553346
28	DNA	STMGB89	Putative RNA helicase	-0.727518	0.429157
13	Amino acid metabolism	STMGU61	Similar to alanine--glyoxylate aminotransferase	-0.727435	0.233616
17.5	Ethylene	STMGD11	ERF/AP2 transcription factor family (ATERF-9)	-0.726327	0.502455
35	Not Assigned	STMFA05	ABC1 family protein	-0.726267	0.533595
28	DNA	STMCR64	Putative phosphoesterase	-0.717312	0.343467
20	Stress	STMDV12	Disease resistance-responsive family protein	-0.716845	0.276205
4	Glycolysis	STMGF18	Phosphoenolpyruvate carboxylase kinase 2	-0.716674	0.506063
34	Transport	STMGD94	Similar to ABC transporter 10	-0.716266	0.427022
15	Metal Handeling	STMGS26	Methallothioneine-like protein	0.721678	0.414523
27/33	RNA/Development/Stress	STMIY82	Jasmonic acid 2	0.736221	0.361369
35	Not Assigned	STMHI64	None	0.744282	0.407818
27/33	RNA/Development	STMCV89	No apical meristem (NAM) family protein	0.754625	0.638555
29	Protein	STMIR76I	60S Ribosomal protein L36	0.758205	0.180554
35	Not Assigned	STMEQ18	Putative phytosulfokine peptide precursor	0.765802	0.327435
34	Transport	STMJJ19	Peptide transporter-like protein	0.783378	0.795787
35	Not Assigned	STMHQ27	None	0.792256	0.209855
10.5	Cell Wall	STMGX29	Extensin precusor	0.798673	0.412348
20	Stress	STMEK46	Hsp90-2-like	0.81496	0.140648
11.6	Cell Wall	STMIP64	Lipid transfer protein LTP1	0.817218	0.420944
29	Protein	STMIX83	60S ribosomal protein L6	0.826368	0.0316504
29	Protein	STMJC30	Phytophthora-inhibited protease 1	0.838529	0.276205
1	Photosynthesis	STMIU53	PGR5-like	0.844325	0.262482
20	Stress	STMIN04	Pathogenesis-related protein 1b precursor	0.847098	0.505545
20	Stress	STMIU06	Pathogenesis-related protein P2 precursor	0.891949	0.275497
29	Protein	STMIX54	Clp protease proteolytic subunit (ClpP)	0.90299	0.00130446
20	Stress	STMGE38	TAS14 (Le4) dehydrin	0.921453	0.427022
26	Misc	STMHX28	Cytokinin-O-glucosyltransferase 3	0.950067	0.00617393
26	Misc	STMID59	Cytochrome P450	0.951318	0.096003
29	Protein	STMJB45F	Cathepsin B-like cysteine proteinase	0.969666	0.0193039
20	Stress	STMBB21	Glucan endo-1,3-beta-glucosidase A precursor	0.979932	0.327435
35	Not Assigned	STMEA95	Weakly similar to carboxylesterase	1.01086	0.0193039
20	Stress	STMJO29	Cold-stress inducible protein	1.01347	0.178361
34	Transport	STMCC78H	ABC transporter protein F family protein 5-like	1.16669	2.67898e-05
20	Stress	STMEO91G	Class II chitinase	1.34236	0.192744
A The top 100 cDNA spots with largest fold changes (|FC|=0.73-3.93) at 8 hr after wounding in LapA-SI leaves were identified. FC (fold change) is the ratio of signals in LapA-SI/WT leaves. The significance of signal changes in LapA-SI relative to WT plants at 8 hr after wounding is indicated (p value). Due to the redundancy in cDNA spots (see footnotes D-H), the top 107 spots were examined.
B MapMan often placed genes in multiple BINs; therefore multiple designations are indicated. It should be noted that there was no extensive manual annotation of the cDNAs that appear in this table. Therefore, spots with similar names may encode for RNAs from the same gene.
C LapN was annotated as an up-regulated DEG. This is in striking contrast to the previous studies monitoring the rare-class LapN RNAs by RNA blots or RNase protection studies or monitoring LAP-N protein levels [24,116]. It is likely that the abundant wound-induced LapA transcript cross-hybridized to the LapN ESTs on the array, since the potato LapN EST has 95.6% and 88.9% identity with the tomato…
D PPO-B was represented by two cDNAs (STMDB46,STMCI55) in the top 100 spots with largest fold changes.Only the STMCI55 data is shown.
E Jasmonate Zim-domain three was represented by two cDNAs (STMCV86, STMCZ36) in the top 100 spots with largest fold changes.Only the STMCV86 data is shown.
F Capthepsin B was represented by two cDNAs (STMJB45, STMEU11) in the top 100 spots with largest fold changes.Only the STMJB45 data is shown.
G Class II chitinase (acidic) was represented by two cDNAs (STMJD93, STME091) in the top 100 spots with largest fold changes.Only the STME091 data is shown.
HABC transporter protein F family protein 5-like was represented by two cDNAs (STMCC78 ,STMDP40) in the top 100 spots with largest fold changes. Only the STMCC78 data is shown.
I60S Ribosomal protein L36 was represented by two cDNAs (STMIR76,STMJA94) in the top 100 spots with largest fold changes. Only the STMIR76 data is shown.
